# Supplementary material for: A Good Compromise: Rapid and Robust Species Proxies for Inventorying Biodiversity Hotspots Using the Terebridae (Gastropoda: Conoidea)
Source: PubMed Central journal article supplement (PMC4086986; doi:10.1371/journal.pone.0102160), 2014-07-08
Supplement: pone.0102160.s002.pdf [file pone.0102160.s002.pdf]

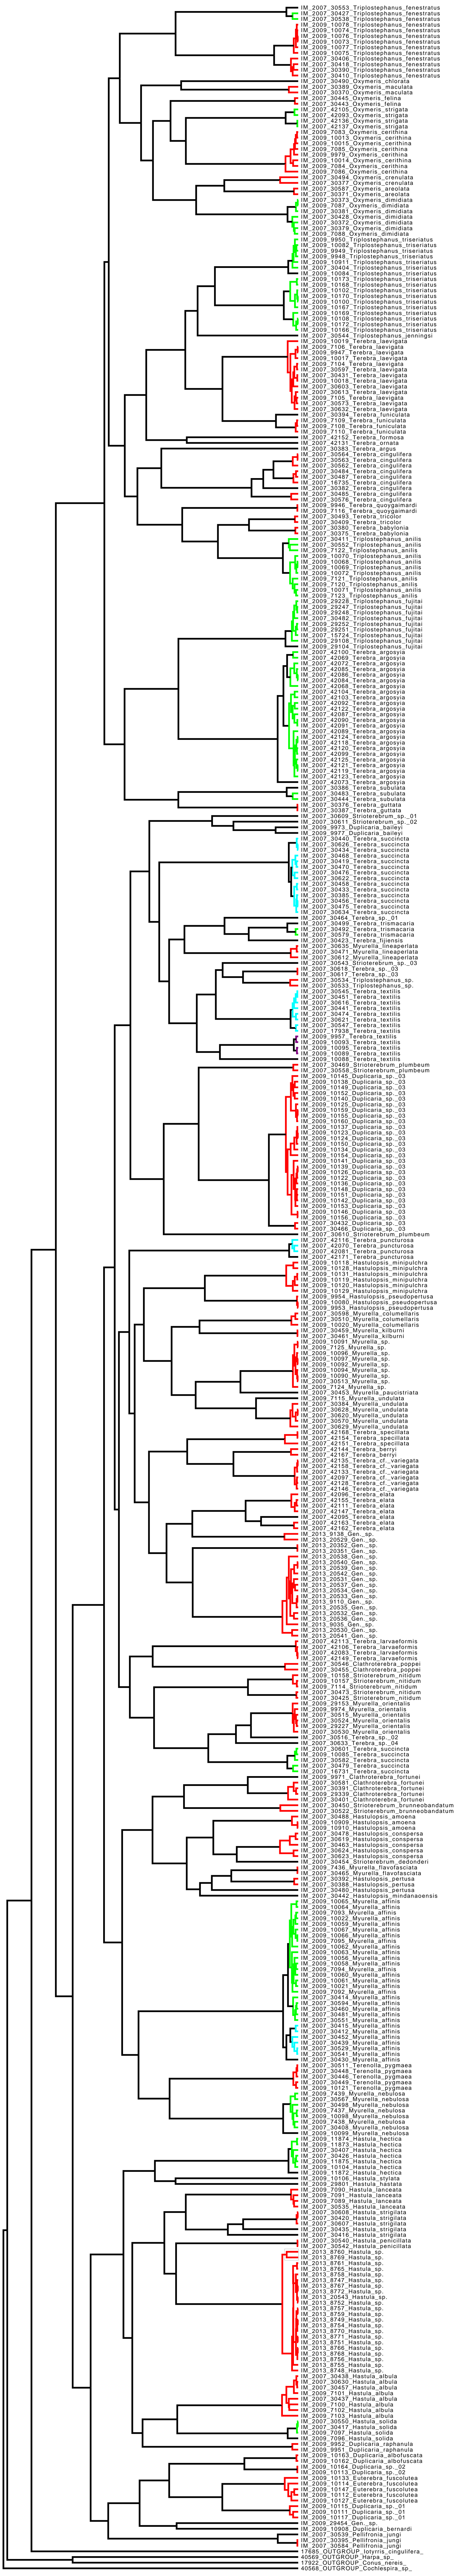

IM 2007 30553 Triplostephanus fenestratus  
IM 2007 30492 Triplostephanus fenestratus  
IM 2007 30538 Triplostephanus fenestratus  
IM 2009 10078 Triplostephanus fenestratus  
IM 2009 10074 Triplostephanus fenestratus  
IM 2009 10076 Triplostephanus fenestratus  
IM 2009 10077 Triplostephanus fenestratus  
IM 2009 10075 Triplostephanus fenestratus  
IM 2007 30406 Triplostephanus fenestratus  
IM 2007 30418 Triplostephanus fenestratus  
IM 2007 30390 Triplostephanus fenestratus  
IM 2007 30410 Triplostephanus fenestratus  
IM 2007 30490 Oxymeris chlorata  
IM 2007 30389 Oxymeris maculata  
IM 2007 30370 Oxymeris maculata  
IM 2007 30445 Oxymeris retina  
IM 2007 30453 Oxymeris felina  
IM 2007 42105 Oxymeris strigata  
IM 2007 42093 Oxymeris strigata  
IM 2007 42136 Oxymeris strigata  
IM 2007 42137 Oxymeris strigata  
IM 2007 7083 Oxymeris cerithina  
IM 2009 10013 Oxymeris cerithina  
IM 2009 10015 Oxymeris cerithina  
IM 2009 7085 Oxymeris cerithina  
IM 2009 9979 Oxymeris cerithina  
IM 2009 10014 Oxymeris cerithina  
IM 2009 7084 Oxymeris cerithina  
IM 2009 7086 Oxymeris cerithina  
IM 2007 30494 Oxymeris crenulata  
IM 2007 30377 Oxymeris crenulata  
IM 2007 30387 Oxymeris areolata  
IM 2007 30371 Oxymeris areolata  
IM 2007 30373 Oxymeris dimidiata  
IM 2009 7087 Oxymeris dimidiata  
IM 2007 30381 Oxymeris dimidiata  
IM 2007 30372 Oxymeris dimidiata  
IM 2007 30379 Oxymeris dimidiata  
IM 2009 9950 Triplostephanus triseriatus  
IM 2009 10082 Triplostephanus triseriatus  
IM 2009 9949 Triplostephanus triseriatus  
IM 2009 9948 Triplostephanus triseriatus  
IM 2009 10911 Triplostephanus triseriatus  
IM 2007 30404 Triplostephanus triseriatus  
IM 2009 10084 Triplostephanus triseriatus  
IM 2009 10175 Triplostephanus triseriatus  
IM 2009 10169 Triplostephanus triseriatus  
IM 2009 10102 Triplostephanus triseriatus  
IM 2009 10170 Triplostephanus triseriatus  
IM 2009 10100 Triplostephanus triseriatus  
IM 2009 10167 Triplostephanus triseriatus  
IM 2009 10168 Triplostephanus triseriatus  
IM 2009 10108 Triplostephanus triseriatus  
IM 2009 10172 Triplostephanus triseriatus  
IM 2009 10166 Triplostephanus triseriatus  
IM 2007 30544 Triplostephanus jenningsi  
IM 2009 7109 Terebra laevigata  
IM 2009 9947 Terebra laevigata  
IM 2009 10017 Terebra laevigata  
IM 2009 7104 Terebra laevigata  
IM 2007 30597 Terebra laevigata  
IM 2007 30437 Terebra laevigata  
IM 2009 10018 Terebra laevigata  
IM 2007 30603 Terebra laevigata  
IM 2007 30613 Terebra laevigata  
IM 2009 7105 Terebra laevigata  
IM 2007 30632 Terebra laevigata  
IM 2007 30394 Terebra funiculata  
IM 2009 7109 Terebra funiculata  
IM 2009 7108 Terebra funiculata  
IM 2007 42152 Terebra formosa  
IM 2007 42131 Terebra ornata  
IM 2007 30383 Terebra argus  
IM 2007 30564 Terebra cingulifera  
IM 2007 30563 Terebra cingulifera  
IM 2007 30562 Terebra cingulifera  
IM 2007 30484 Terebra cingulifera  
IM 2007 30487 Terebra cingulifera  
IM 2007 16735 Terebra cingulifera  
IM 2007 30582 Terebra cingulifera  
IM 2007 30576 Terebra cingulifera  
IM 2009 9946 Terebra quoygaimardi  
IM 2007 30493 Terebra tricolor  
IM 2007 30409 Terebra tricolor  
IM 2007 30380 Terebra babylonia  
IM 2007 30375 Terebra babylonia  
IM 2007 30411 Triplostephanus anilis  
IM 2007 30552 Triplostephanus anilis  
IM 2009 7122 Triplostephanus anilis  
IM 2009 10070 Triplostephanus anilis  
IM 2009 10068 Triplostephanus anilis  
IM 2009 10069 Triplostephanus anilis  
IM 2009 10072 Triplostephanus anilis  
IM 2009 7121 Triplostephanus anilis  
IM 2009 7120 Triplostephanus anilis  
IM 2009 10071 Triplostephanus anilis  
IM 2009 29228 Triplostephanus fujitai  
IM 2009 29247 Triplostephanus fujitai  
IM 2009 29248 Triplostephanus fujitai  
IM 2007 30482 Triplostephanus fujitai  
IM 2009 29252 Triplostephanus fujitai  
IM 2009 29251 Triplostephanus fujitai  
IM 2007 15724 Triplostephanus fujitai  
IM 2009 29103 Triplostephanus fujitai  
IM 2009 29104 Triplostephanus fujitai  
IM 2007 42100 Terebra argosyia  
IM 2007 42069 Terebra argosyia  
IM 2007 42072 Terebra argosyia  
IM 2007 42085 Terebra argosyia  
IM 2007 42084 Terebra argosyia  
IM 2007 42084 Terebra argosyia  
IM 2007 42068 Terebra argosyia  
IM 2007 42104 Terebra argosyia  
IM 2007 42103 Terebra argosyia  
IM 2007 42092 Terebra argosyia  
IM 2007 42122 Terebra argosyia  
IM 2007 42087 Terebra argosyia  
IM 2007 42090 Terebra argosyia  
IM 2007 42091 Terebra argosyia  
IM 2007 42089 Terebra argosyia  
IM 2007 42089 Terebra argosyia  
IM 2007 42124 Terebra argosyia  
IM 2007 42118 Terebra argosyia  
IM 2007 42120 Terebra argosyia  
IM 2007 42099 Terebra argosyia  
IM 2007 42125 Terebra argosyia  
IM 2007 42121 Terebra argosyia  
IM 2007 42119 Terebra argosyia  
IM 2007 42073 Terebra argosyia  
IM 2007 30386 Terebra subulata  
IM 2007 30443 Terebra subulata  
IM 2007 30444 Terebra subulata  
IM 2007 30376 Terebra guttata  
IM 2007 30387 Terebra guttata  
IM 2007 30609 Strioterebrum sp.\_01  
IM 2007 30611 Strioterebrum sp.\_02  
IM 2009 9973 Duplicaria baileyi  
IM 2009 9977 Duplicaria baileyi  
IM 2007 30440 Terebra succincta  
IM 2007 30626 Terebra succincta  
IM 2007 30434 Terebra succincta  
IM 2007 30468 Terebra succincta  
IM 2007 30419 Terebra succincta  
IM 2007 30470 Terebra succincta  
IM 2007 30476 Terebra succincta  
IM 2007 30622 Terebra succincta  
IM 2007 30458 Terebra succincta  
IM 2007 30433 Terebra succincta  
IM 2007 30385 Terebra succincta  
IM 2007 30456 Terebra succincta  
IM 2007 30475 Terebra succincta  
IM 2007 30634 Terebra sp.\_01  
IM 2007 30464 Terebra sp.\_01  
IM 2007 30499 Terebra trismacaria  
IM 2007 30492 Terebra trismacaria  
IM 2007 30579 Terebra trismacaria  
IM 2007 30423 Terebra fijiensis  
IM 2007 30635 Myurella lineaperlata  
IM 2007 30471 Myurella lineaperlata  
IM 2007 30612 Myurella lineaperlata  
IM 2007 30543 Strioterebrum sp.\_03  
IM 2007 30618 Terebra sp.\_03  
IM 2007 30617 Terebra sp.\_03  
IM 2007 30534 Triplostephanus sp.  
IM 2007 30533 Triplostephanus sp.  
IM 2007 30545 Terebra textilis  
IM 2007 30451 Terebra textilis  
IM 2007 30615 Terebra textilis  
IM 2007 30441 Terebra textilis  
IM 2007 30474 Terebra textilis  
IM 2007 30621 Terebra textilis  
IM 2007 30547 Terebra textilis  
IM 2007 17938 Terebra textilis  
IM 2009 9957 Terebra textilis  
IM 2009 10093 Terebra textilis  
IM 2009 10095 Terebra textilis  
IM 2009 10089 Terebra textilis  
IM 2009 10088 Terebra textilis  
IM 2007 30469 Strioterebrum plumbeum  
IM 2007 30558 Strioterebrum plumbeum  
IM 2009 10145 Duplicaria sp.\_03  
IM 2009 10138 Duplicaria sp.\_03  
IM 2009 10149 Duplicaria sp.\_03  
IM 2009 10146 Duplicaria sp.\_03  
IM 2009 10147 Duplicaria sp.\_03  
IM 2009 10125 Duplicaria sp.\_03  
IM 2009 10159 Duplicaria sp.\_03  
IM 2009 10155 Duplicaria sp.\_03  
IM 2009 10160 Duplicaria sp.\_03  
IM 2009 10137 Duplicaria sp.\_03  
IM 2009 10123 Duplicaria sp.\_03  
IM 2009 10124 Duplicaria sp.\_03  
IM 2009 10150 Duplicaria sp.\_03  
IM 2009 10134 Duplicaria sp.\_03  
IM 2009 10154 Duplicaria sp.\_03  
IM 2009 10141 Duplicaria sp.\_03  
IM 2009 10139 Duplicaria sp.\_03  
IM 2009 10126 Duplicaria sp.\_03  
IM 2009 10122 Duplicaria sp.\_03  
IM 2009 10136 Duplicaria sp.\_03  
IM 2009 10148 Duplicaria sp.\_03  
IM 2009 10142 Duplicaria sp.\_03  
IM 2009 10153 Duplicaria sp.\_03  
IM 2009 10146 Duplicaria sp.\_03  
IM 2009 10156 Duplicaria sp.\_03  
IM 2007 30432 Duplicaria sp.\_03  
IM 2007 30466 Duplicaria sp.\_03  
IM 2007 30610 Strioterebrum plumbeum  
IM 2007 42116 Terebra puncturosa  
IM 2007 42070 Terebra puncturosa  
IM 2007 42081 Terebra puncturosa  
IM 2007 42171 Terebra puncturosa  
IM 2009 10118 Hastulopsis minipulchra  
IM 2009 10128 Hastulopsis minipulchra  
IM 2009 10131 Hastulopsis minipulchra  
IM 2009 10119 Hastulopsis minipulchra  
IM 2009 10120 Hastulopsis minipulchra  
IM 2009 10129 Hastulopsis minipulchra  
IM 2009 9954 Hastulopsis pseudopertusa  
IM 2007 10080 Hastulopsis pseudopertusa  
IM 2009 9953 Hastulopsis pseudopertusa  
IM 2007 30598 Myurella columellaris  
IM 2007 30510 Myurella columellaris  
IM 2009 10020 Myurella columellaris  
IM 2007 30459 Myurella kiburni  
IM 2009 10091 Myurella sp.  
IM 2009 7125 Myurella sp.  
IM 2009 10096 Myurella sp.  
IM 2009 10097 Myurella sp.  
IM 2009 10097 Myurella sp.  
IM 2009 10094 Myurella sp.  
IM 2009 10090 Myurella sp.  
IM 2007 30513 Myurella sp.  
IM 2009 7124 Myurella sp.  
IM 2007 30453 Myurella paucistriata  
IM 2009 7115 Myurella undulata  
IM 2007 30384 Myurella undulata  
IM 2007 30628 Myurella undulata  
IM 2007 30620 Myurella undulata  
IM 2007 30570 Myurella undulata  
IM 2007 30629 Myurella undulata  
IM 2007 42168 Terebra specillata  
IM 2007 42154 Terebra specillata  
IM 2007 42151 Terebra specillata  
IM 2007 42144 Terebra berryi  
IM 2007 42167 Terebra berryi  
IM 2007 42135 Terebra cf. variegata  
IM 2007 42158 Terebra cf. variegata  
IM 2007 42133 Terebra cf. variegata  
IM 2007 42097 Terebra cf. variegata  
IM 2007 42148 Terebra cf. variegata  
IM 2007 42148 Terebra cf. variegata  
IM 2007 42096 Terebra elata  
IM 2007 42155 Terebra elata  
IM 2007 42111 Terebra elata  
IM 2007 42147 Terebra elata  
IM 2007 42095 Terebra elata  
IM 2007 42163 Terebra elata  
IM 2007 42162 Terebra elata  
IM 2013 9138 Gen.\_sp.  
IM 2013 20529 Gen.\_sp.  
IM 2013 20528 Gen.\_sp.  
IM 2013 20351 Gen.\_sp.  
IM 2013 20538 Gen.\_sp.  
IM 2013 20540 Gen.\_sp.  
IM 2013 20539 Gen.\_sp.  
IM 2013 20538 Gen.\_sp.  
IM 2013 20537 Gen.\_sp.  
IM 2013 20534 Gen.\_sp.  
IM 2013 20533 Gen.\_sp.  
IM 2013 9110 Gen.\_sp.  
IM 2013 20535 Gen.\_sp.  
IM 2013 20532 Gen.\_sp.  
IM 2013 20536 Gen.\_sp.  
IM 2013 9035 Gen.\_sp.  
IM 2013 20530 Gen.\_sp.  
IM 2013 20541 Gen.\_sp.  
IM 2007 42113 Terebra larvaeformis  
IM 2007 42106 Terebra larvaeformis  
IM 2007 42083 Terebra larvaeformis  
IM 2007 42149 Terebra larvaeformis  
IM 2007 30455 Clathroterebra poppei  
IM 2009 10158 Strioterebrum nitidum  
IM 2009 10157 Strioterebrum nitidum  
IM 2007 7114 Strioterebrum nitidum  
IM 2007 30475 Strioterebrum nitidum  
IM 2009 29153 Myurella orientalis  
IM 2009 9974 Myurella orientalis  
IM 2007 30515 Myurella orientalis  
IM 2007 30524 Myurella orientalis  
IM 2009 10065 Myurella orientalis  
IM 2007 30530 Myurella orientalis  
IM 2007 30516 Terebra sp.\_02  
IM 2007 30633 Terebra sp.\_04  
IM 2007 30601 Terebra succincta  
IM 2007 30582 Terebra succincta  
IM 2007 30479 Terebra succincta  
IM 2007 16731 Terebra succincta  
IM 2009 9971 Clathroterebra fortunei  
IM 2007 30381 Clathroterebra fortunei  
IM 2009 29339 Clathroterebra fortunei  
IM 2007 30401 Clathroterebra fortunei  
IM 2007 30450 Strioterebrum brunneobandatum  
IM 2007 30452 Strioterebrum brunneobandatum  
IM 2009 10909 Hastulopsis amoena  
IM 2009 10910 Hastulopsis amoena  
IM 2007 30478 Hastulopsis conspersa  
IM 2007 30619 Hastulopsis conspersa  
IM 2007 30463 Hastulopsis conspersa  
IM 2007 30624 Hastulopsis conspersa  
IM 2007 30623 Hastulopsis conspersa  
IM 2007 30454 Strioterebrum dedonderi  
IM 2009 7436 Myurella flavofasciata  
IM 2007 30465 Myurella flavofasciata  
IM 2007 30388 Hastulopsis pertusa  
IM 2007 30480 Hastulopsis pertusa  
IM 2007 30442 Hastulopsis mindanaoensis  
IM 2009 10085 Myurella affinis  
IM 2009 7093 Myurella affinis  
IM 2009 10022 Myurella affinis  
IM 2009 10059 Myurella affinis  
IM 2009 10067 Myurella affinis  
IM 2009 10066 Myurella affinis  
IM 2009 7095 Myurella affinis  
IM 2009 10062 Myurella affinis  
IM 2009 10063 Myurella affinis  
IM 2009 10056 Myurella affinis  
IM 2009 10068 Myurella affinis  
IM 2009 7094 Myurella affinis  
IM 2009 10060 Myurella affinis  
IM 2009 10061 Myurella affinis  
IM 2009 10021 Myurella affinis  
IM 2009 7092 Myurella affinis  
IM 2007 30594 Myurella affinis  
IM 2007 30460 Myurella affinis  
IM 2007 30481 Myurella affinis  
IM 2007 30551 Myurella affinis  
IM 2007 30415 Myurella affinis  
IM 2007 30412 Myurella affinis  
IM 2007 30452 Myurella affinis  
IM 2007 30439 Myurella affinis  
IM 2007 30529 Myurella affinis  
IM 2009 10133 Myurella affinis  
IM 2007 30430 Myurella affinis  
IM 2007 30511 Terebra pygmaea  
IM 2007 30448 Terebra pygmaea  
IM 2007 30446 Terebra pygmaea  
IM 2007 30449 Terebra pygmaea  
IM 2009 10121 Terebra pygmaea  
IM 2009 7439 Myurella nebulosa  
IM 2007 30567 Myurella nebulosa  
IM 2007 30498 Myurella nebulosa  
IM 2009 7437 Myurella nebulosa  
IM 2007 30458 Myurella nebulosa  
IM 2009 7438 Myurella nebulosa  
IM 2007 30408 Myurella nebulosa  
IM 2009 10099 Myurella nebulosa  
IM 2009 11874 Hastula hectica  
IM 2009 11873 Hastula hectica  
IM 2007 30407 Hastula hectica  
IM 2007 30426 Hastula hectica  
IM 2009 11875 Hastula hectica  
IM 2009 10104 Hastula hectica  
IM 2009 11872 Hastula hectica  
IM 2007 30407 Hastula stylata  
IM 2009 29801 Hastula hastata  
IM 2009 7090 Hastula lanceata  
IM 2007 7091 Hastula lanceata  
IM 2009 7089 Hastula lanceata  
IM 2007 30635 Hastula strigilata  
IM 2007 30420 Hastula strigilata  
IM 2007 30607 Hastula strigilata  
IM 2007 30435 Hastula strigilata  
IM 2007 30540 Hastula penicillata  
IM 2007 30542 Hastula penicillata  
IM 2013 8769 Hastula sp.  
IM 2013 8768 Hastula sp.  
IM 2013 8758 Hastula sp.  
IM 2013 8747 Hastula sp.  
IM 2013 8767 Hastula sp.  
IM 2013 8773 Hastula sp.  
IM 2013 20543 Hastula sp.  
IM 2013 8752 Hastula sp.  
IM 2013 8759 Hastula sp.  
IM 2013 8749 Hastula sp.  
IM 2013 8754 Hastula sp.  
IM 2013 8770 Hastula sp.  
IM 2013 8771 Hastula sp.  
IM 2013 8751 Hastula sp.  
IM 2013 8766 Hastula sp.  
IM 2013 8765 Hastula sp.  
IM 2013 8755 Hastula sp.  
IM 2013 8748 Hastula sp.  
IM 2007 30438 Hastula albula  
IM 2007 30630 Hastula albula  
IM 2009 7100 Hastula albula  
IM 2007 30437 Hastula albula  
IM 2009 7100 Hastula albula  
IM 2007 7102 Hastula albula  
IM 2007 30550 Hastula solida  
IM 2007 30417 Hastula solida  
IM 2009 7097 Hastula solida  
IM 2009 9966 Hastula solida  
IM 2009 9925 Duplicaria raphanula  
IM 2009 10163 Duplicaria raphanula  
IM 2009 10162 Duplicaria albofuscata  
IM 2009 10164 Duplicaria sp.\_02  
IM 2009 10113 Duplicaria sp.\_02  
IM 2009 10114 Euterebra fuscolutea  
IM 2009 10117 Euterebra fuscolutea  
IM 2009 10122 Euterebra fuscolutea  
IM 2009 10115 Duplicaria sp.\_01  
IM 2009 10111 Duplicaria sp.\_01  
IM 2009 29454 Gen.\_sp.  
IM 2009 10908 Duplicaria bernardi  
IM 2007 30395 Pellifrona junci  
IM 2007 30395 Pellifrona junci  
IM 2007 30584 Pellifrona junci  
17685 OUTGROUP\_totyris\_cingulifera\_  
40569 OUTGROUP\_Harpa\_sp\_  
17222 OUTGROUP\_Conus\_nerites\_  
40568 OUTGROUP\_conuspirita\_sp\_  
17222 OUTGROUP\_Conus\_nerites\_  
40568 OUTGROUP\_conuspirita\_sp\_
