# Supplementary material for: A Good Compromise: Rapid and Robust Species Proxies for Inventorying Biodiversity Hotspots Using the Terebridae (Gastropoda: Conoidea)
Source: PubMed Central journal article supplement (PMC4086986; doi:10.1371/journal.pone.0102160), 2014-07-08
Supplement: pone.0102160.s003.pdf [file pone.0102160.s003.pdf]

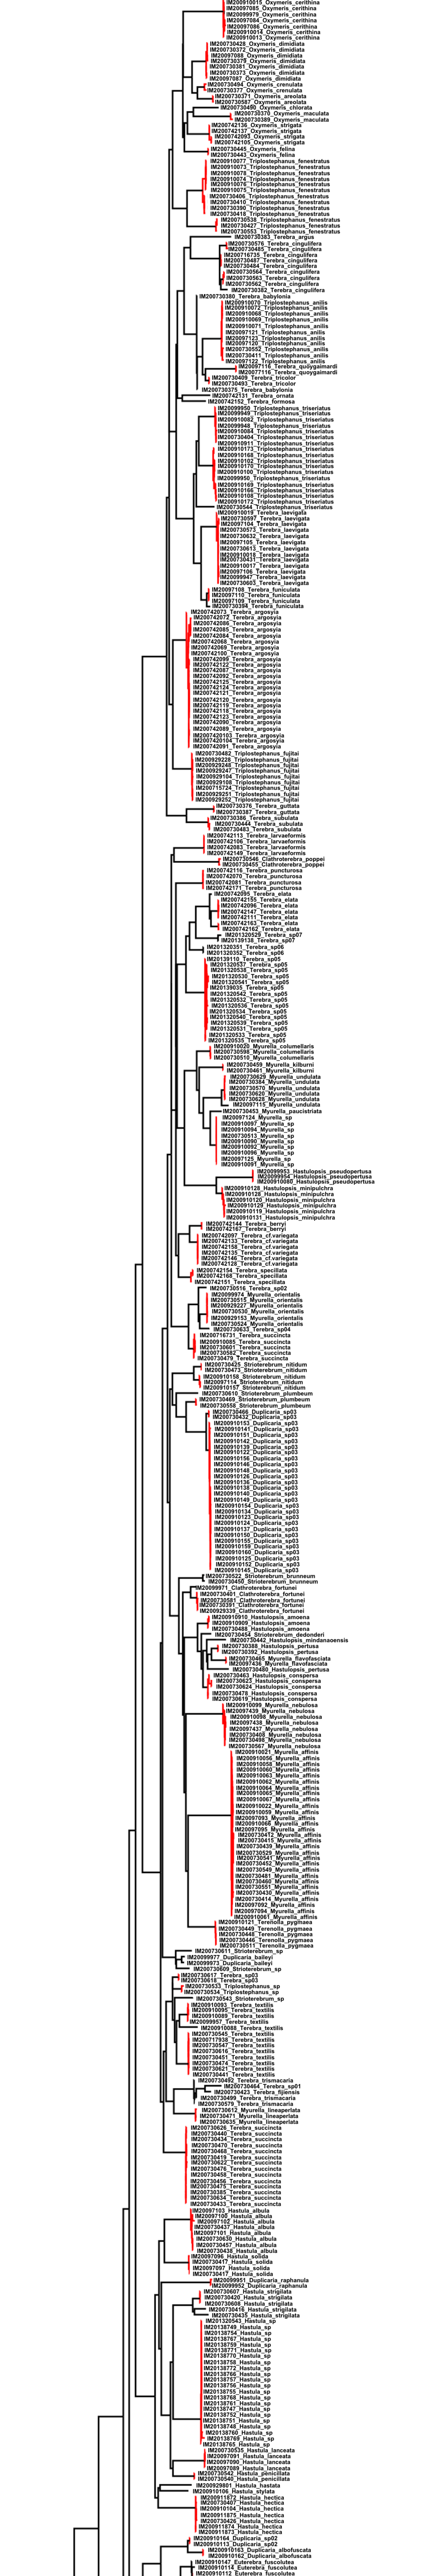

40568\_OUTGROUP\_Cochlespira\_sp  
17685\_OUTGROUP\_Jotyrris\_cingulifera  
40569\_OUTGROUP\_Harpa\_sp  
17922\_OUTGROUP\_Conus\_nereis
