# Supplementary material for: A Good Compromise: Rapid and Robust Species Proxies for Inventorying Biodiversity Hotspots Using the Terebridae (Gastropoda: Conoidea)
Source: PLoS One. 2014 Jul 8;9(7):e102160. doi: 10.1371/journal.pone.0102160 (PMC4086986; doi:10.1371/journal.pone.0102160)
Supplement: Table S1 — List of Terebridae specimens analyzed. Table indicates morphospecies identification and collection data, together with PSH assignment (ABGD lumper and splitter partitions, GMYC single and multiple thresholds and PTP), statistical support (Bootstraps and Posterior Probabilities) for both COI and 28S loci for each defined PSH and Klee results. (XLSX) [file pone.0102160.s004.xlsx]

## Sheet: Foglio1
MNHN #	Genus	species	Expedition	Country	Station	Latitude, Longitude, depth (m)	BOLD	GB COI	GB 28S	ABGD (lumper partition)			ABGD (splitter partition)			Assignation with Klee	GMYC single			GMYC multiple			PTP
										PSH	B/PP (COI)	B/PP (28S)	PSH	B/PP (COI)	B/PP (28S)		PSH	B/PP (COI)	B/PP (28S)	PSH	B/PP (COI)	B/PP (28S)	PSH	B/PP (COI)	B/PP (28S)
IM_2007_15724	Triplostephanus	fujitai	PANGLAO 2005	Philippines	CP2343	9°27'N, 123°49'E; 273-356	CONO306-08	EU015725	EU015610	1	87/1	91/0.96				1				1b
IM_2007_30482	Triplostephanus	fujitai	BOA1	Vanuatu	CP2413	15°42'S, 167°02'E; 268-445	CONO181-08	EU685492	KJ710230	1	87/1	91/0.96				1				1b
IM_2009_29104	Triplostephanus	fujitai	EXBODI	New-Caledonia	CP3833	22°02'S, 167°04'E; 325-332	CONO1754-14	KJ672209		1	87/1					1				1a
IM_2009_29108	Triplostephanus	fujitai	EXBODI	New-Caledonia	CP3800	21°32'S,166°22'E; 279-282	CONO1755-14	KJ672194		1	87/1					1				1b
IM_2009_29228	Triplostephanus	fujitai	EXBODI	New-Caledonia	CP3829	22°02'S, 167°05'E; 350-360	CONO1758-14	KJ672188		1	87/1					1				1b
IM_2009_29247	Triplostephanus	fujitai	EXBODI	New-Caledonia	CP3806	21°42'S, 166°34'E; 307-309	CONO1759-14	KJ672186		1	87/1					1				1b
IM_2009_29248	Triplostephanus	fujitai	EXBODI	New-Caledonia	CP3821	21°53'S, 166°50'E; 211-440	CONO1760-14	KJ672212		1	87/1					1				1b
IM_2009_29251	Triplostephanus	fujitai	EXBODI	New-Caledonia	CP3821	21°53'S, 166°50'E; 211-440	CONO1761-14	KJ672192		1	87/1					1				1b
IM_2009_29252	Triplostephanus	fujitai	EXBODI	New-Caledonia	DW3872	22°54'S, 169°27'E; 159-756	CONO1762-14	KJ672208		1	87/1					1				1b
IM_2007_16731	Terebra	succincta	PANGLAO 2005	Philippines	CP2393	9°30'N, 123°42'E; 356-396	CONO331-08	EU015732	EU015617	2	84/1	99/1				2				2a
IM_2007_30479	Terebra	succincta	SALOMON 2	Solomon Islands	DW2204	7°14' S, 158°29' E; 286-423	CONO379-08	EU685534		2	84/1					2				2a
IM_2007_30582	Terebra	succincta	PANGLAO 2005	Philippines	CP2331	9°39'N, 123°48'E; 255-268	CONO285-08	EU685527	KJ710220	2	84/1	99/1				2				2b
IM_2007_30601	Terebra	succincta	SANTO 2006	Vanuatu	AT70	15°41'S, 167°00'E; 517-614	CONO492-08	EU685605		2	84/1					2				2b
IM_2009_10085	Terebra	succincta	CONCALIS	New-Caledonia	CP3026	20°17'S, 163°50'E; 590-809	CONO1187-12	JQ809187	KJ710217	2	84/1	99/1				2				2b
IM_2007_16735	Terebra	cingulifera	PANGLAO 2005	Philippines	CP2395	9°36'N, 123°44'E; 382-434	CONO340-08	EU015735	EU015620	3	100/1	84/0.67	3a	64/0.9		3a	3a	64/0.9		3a	64/0.9		3a	64/0.9
IM_2007_30382	Terebra	cingulifera	SANTO 2006	Vanuatu	VM32	15°26.6'S, 167°15.2'E;	CONO1347-12	JQ809144	JQ808989	3	100/1	84/0.67	3b	n/a		3b	3b	n/a		3b	n/a		3b	n/a
IM_2007_30484	Terebra	cingulifera	SALOMON 2	Solomon Islands	CP2284	8°38' S, 157°22' E; 195-197	CONO1186-12	JQ809145		3	100/1		3a	64/0.9		3a	3a	64/0.9		3a	64/0.9		3a	64/0.9
IM_2007_30485	Terebra	cingulifera	SANTO 2006	Vanuatu	ZR11	15°32.5'S, 167°10.5'E; 5-10	CONO490-08	EU685603		3	100/1		3c	100/1		3c	3c	100/1		3c	100/1		3c	100/1
IM_2007_30487	Terebra	cingulifera	SALOMON 2	Solomon Islands	CP2285	8°40' S, 157°23' E; 214-243	CONO382-08	EU685536		3	100/1		3a	64/0.9		3a	3a	64/0.9		3a	64/0.9		3a	64/0.9
IM_2007_30562	Terebra	cingulifera	AURORA 2007	Philippines	CP2654	16°04'N, 121°57'E; 98-107	CONO1158-12	JQ809146	KJ710200	3	100/1	84/0.67	3d	89/0.93		3d	3d	89/0.93		3d	89/0.93		3d	85/0.93
IM_2007_30563	Terebra	cingulifera	AURORA 2007	Philippines	CP2653	16°05,85'N, 121°58,85'E; 83	CONO1283-12	JQ809147		3	100/1		3d	89/0.93		3d	3d	89/0.93		3d	89/0.93		3d	85/0.93
IM_2007_30564	Terebra	cingulifera	AURORA 2007	Philippines	CP2665	15°54'N, 121°42'E; 125-198	CONO1129-12	JQ809148		3	100/1		3d	89/0.93		3d	3d	89/0.93		3d	89/0.93		3d	85/0.93
IM_2007_30576	Terebra	cingulifera	SANTO 2006	Vanuatu	FR14	15°36.8'S, 167°08.7'E; 3-36	CONO1191-12	JQ809149	KJ710199	3	100/1	84/0.67	3c	100/1		3c	3c	100/1		3c	100/1		3c	100/1
IM_2007_17938	Terebra	textilis	SANTO 2006	Vanuatu	LD28	15°35.4'S, 166°58.7'E; 3-8	CONO509-08	EU015750	EU015635	4	98/1					4				4a	64/0.87
IM_2007_30441	Terebra	textilis	SANTO 2006	Vanuatu	LD34	15°33.4'S, 167°12.4'E; 2-6	CONO1258-12	JQ809188		4	98/1					4				4b	-/0.17
IM_2007_30451	Terebra	textilis	PANGLAO 2004	Philippines	M51	9°36.8'N, 123°52.2'E;	CONO261-08	EU685519		4	98/1					4				4b	-/0.17
IM_2007_30474	Terebra	textilis	SANTO 2006	Vanuatu	LD28	15°35.4'S, 166°58.7'E; 3-8	CONO508-08	EU685618	JQ808996	4	98/1					4				4b	-/0.17	-/0.15
IM_2007_30545	Terebra	textilis	SANTO 2006	Vanuatu	LD21	15°31.3'S, 167°09.9'E; 1-6	CONO497-08	EU685609		4	98/1					4				4b	-/0.17
IM_2007_30547	Terebra	textilis	SANTO 2006	Vanuatu	LD21	15°31.3'S, 167°09.9'E; 1-6	CONO496-08	EU685608		4	98/1					4				4a	64/0.87
IM_2007_30616	Terebra	textilis	SANTO 2006	Vanuatu	FR10	n/a	CONO454-08	EU685569		4	98/1					4				4b	-/0.17
IM_2007_30621	Terebra	textilis	SANTO 2006	Vanuatu	FR10	n/a	CONO453-08	EU685568	KJ710222	4	98/1					4				4b	-/0.17	-/0.15
IM_2007_30370	Oxymeris	maculata	PANGLAO 2004	Philippines	R52	9°37.4'N, 123°46.9'E; 3-20	CONO204-08	EU685496		5	97/1					5
IM_2007_30389	Oxymeris	maculata	SANTO 2006	Vanuatu	NR05	15°28.7'S, 167°15.2'E; 19	CONO405-08	EU685541	JQ808983	5	97/1					5
IM_2007_30371	Oxymeris	areolata	SANTO 2006	Vanuatu	NR05	15°28.7'S, 167°15.2'E; 19	CONO406-08	JN589001	JQ808977	6	100/1					6
IM_2007_30587	Oxymeris	areolata	PANGLAO 2004	Philippines	R52	9°37.4'N, 123°46.9'E; 3-20	CONO241-08	EU685513		6	100/1					6
IM_2007_30372	Oxymeris	dimidiata	SANTO 2006	Vanuatu	ZR11	15°32.5'S, 167°10.5'E; 5-10	CONO487-08	EU685601		7	99/1					7				7a	95/0.86
IM_2007_30373	Oxymeris	dimidiata	SANTO 2006	Vanuatu	FR10	n/a	CONO449-08	EU685564	JQ808981	7	99/1	90/0.56				7				7b	-/0.43
IM_2007_30379	Oxymeris	dimidiata	SANTO 2006	Vanuatu	ZR11	15°32.5'S, 167°10.5'E; 5-10	CONO486-08	EU685600		7	99/1					7				7a	95/0.86
IM_2007_30381	Oxymeris	dimidiata	SANTO 2006	Vanuatu	FR71	15°35.4'S, 166°59.7'E; 3-37	CONO510008	EU685619		7	99/1					7				7b	-/0.43
IM_2007_30428	Oxymeris	dimidiata	SANTO 2006	Vanuatu	ZM15	15°38.1'S, 167°05.9'E;	CONO495-08	EU685607		7	99/1					7				7a	95/0.86
IM_2009_7087	Oxymeris	dimidiata	Hors campagne	Mozambique	Inhaca I	25°59.0'S, 32°54.5'E; 0	CONO1209-12	JQ809127	KJ710193	7	99/1	90/0.56				7				7b	-/0.43
IM_2009_7088	Oxymeris	dimidiata	Hors campagne	Mozambique	Inhaca I	25°59.0'S, 32°54.5'E; 0	CONO1331-12	JQ809128	KJ710194	7	99/1	90/0.56				7				7a	95/0.86
IM_2007_30375	Terebra	babylonia	SANTO 2006	Vanuatu	VM73	15°35.8'S, 167°06.1'E;	CONO1227-12	JQ809135	JQ808988	8	69/0.99					8
IM_2007_30380	Terebra	babylonia	SANTO 2006	Vanuatu	VM73	15°35.8'S, 167°06.1'E;	CONO474-08	EU685589		8	69/0.99					8
IM_2007_30376	Terebra	guttata	SANTO 2006	Vanuatu	FR08	15°33.1'S, 167°12.2'E; 3-40	CONO439-08	EU685554		9	100/1					9
IM_2007_30387	Terebra	guttata	SANTO 2006	Vanuatu	FR08	15°33.1'S, 167°12.2'E; 3-40	CONO438-08	EU685553		9	100/1					9
IM_2007_30377	Oxymeris	crenulata	SANTO 2006	Vanuatu	NR07	15°34.4'S, 167°13.1'E; 9	CONO442-08	EU685557		10	97/1					10				10a	n/a
IM_2007_30494	Oxymeris	crenulata	SANTO 2006	Vanuatu	NR07	15°34.4'S, 167°13.1'E; 9	CONO441-08	EU685556	JQ808980	10	97/1					10				10b	n/a
IM_2007_30383	Terebra	argus	SANTO 2006	Vanuatu	VM32	15°26.6'S, 167°15.2'E;	CONO1190-12	JQ809134	JQ808987	11	n/a					11
IM_2007_30384	Myurella	undulata	SANTO 2006	Vanuatu	VM32	15°26.6'S, 167°15.2'E;	CONO472-08	EU685587		12	99/1		12a	88/0.99		12a	12a	82/0.99		12a	82/0.99		12a	82/0.99
IM_2007_30570	Myurella	undulata	SANTO 2006	Vanuatu	ZM15	15°38.1'S, 167°05.9'E;	CONO494-08	EU685606	KJ710186	12	99/1		12a	88/0.99		12a	12a	82/0.99		12a	82/0.99		12a	82/0.99
IM_2007_30620	Myurella	undulata	SANTO 2006	Vanuatu	DR19	15°31.3'S, 167°10.4'E; 3-18	CONO440-08	EU685555	JQ808976	12	99/1		12a	88/0.99		12a	12a	82/0.99		12a	82/0.99		12a	82/0.99
IM_2007_30628	Myurella	undulata	SANTO 2006	Vanuatu	FR08	15°33.1'S, 167°12.2'E; 3-40	CONO409-08	EU685543	KJ710188	12	99/1		12a	88/0.99		12a	12a	82/0.99		12a	82/0.99		12a	82/0.99
IM_2007_30629	Myurella	undulata	SANTO 2006	Vanuatu	FR08	15°33.1'S, 167°12.2'E; 3-40	CONO408-08	EU685542	KJ710187	12	99/1		12a	88/0.99		12a	12a	82/0.99		12a	82/0.99		12a	82/0.99
IM_2009_7115	Myurella	undulata	Hors campagne	Mozambique	Inhaca I	25°59.0'S, 32°54.5'E; 0	CONO1208-12	JQ809118	KJ710189	12	99/1		12b	n/a		12b	12b	n/a		12b	n/a		12b	n/a
IM_2007_30385	Terebra	succincta	SANTO 2006	Vanuatu	VM32	15°26.6'S, 167°15.2'E;	CONO470-08	EU685585	KJ710219	13	99/1	-/0.28	13a	-/-		13				13a	-/-
IM_2007_30419	Terebra	succincta	SANTO 2006	Vanuatu	LD28	15°35.4'S, 166°58.7'E; 3-8	CONO1307-12	JQ809183	KJ710212	13	99/1	-/0.28	13a	-/-		13				13c	74/0.99
IM_2007_30433	Terebra	succincta	SANTO 2006	Vanuatu	LD34	15°33.4'S, 167°12.4'E; 2-6	CONO516-08	EU685621	KJ710216	13	99/1	-/0.28	13a	-/-		13				13a	-/-
IM_2007_30434	Terebra	succincta	SANTO 2006	Vanuatu	LD34	15°33.4'S, 167°12.4'E; 2-6	CONO517-08	EU685622		13	99/1		13a	-/-		13				13b	72/0.76
IM_2007_30440	Terebra	succincta	SANTO 2006	Vanuatu	ED02	15°31.7'S, 167°09.7'E; 18-21	CONO426-08	EU685545	JQ808995	13	99/1	-/0.28	13a	-/-		13				13b	72/0.76
IM_2007_30456	Terebra	succincta	SANTO 2006	Vanuatu	ED02	15°31.7'S, 167°09.7'E; 18-21	CONO427-08	EU685546		13	99/1		13a	-/-		13				13a	-/-
IM_2007_30458	Terebra	succincta	SANTO 2006	Vanuatu	ED02	15°31.7'S, 167°09.7'E; 18-21	CONO428-08	EU685547	KJ710218	13	99/1	-/0.28	13a	-/-		13				13a	-/-
IM_2007_30468	Terebra	succincta	SANTO 2006	Vanuatu	LD28	15°35.4'S, 166°58.7'E; 3-8	CONO1224-12	JQ809184		13	99/1		13a	-/-		13				13c	74/0.99
IM_2007_30470	Terebra	succincta	SANTO 2006	Vanuatu	LD28	15°35.4'S, 166°58.7'E; 3-8	CONO1257-12	JQ809185		13	99/1		13a	-/-		13				13c	74/0.99
IM_2007_30475	Terebra	succincta	SANTO 2006	Vanuatu	FR10	n/a	CONO451-08	EU685566		13	99/1		13a	-/-		13				13a	-/-
IM_2007_30476	Terebra	succincta	SANTO 2006	Vanuatu	FR10	n/a	CONO452-08	EU685567		13	99/1		13a	-/-		13				13c	74/0.99
IM_2007_30622	Terebra	succincta	SANTO 2006	Vanuatu	FR10	n/a	CONO1160-12	JQ809186	KJ710213	13	99/1	-/0.28	13b	na		13				13c	74/0.99
IM_2007_30626	Terebra	succincta	SANTO 2006	Vanuatu	ED02	15°31.7'S, 167°09.7'E; 18-21	CONO425-08	EU685544	KJ710214	13	99/1	-/0.28	13a	-/-		13				13b	72/0.76
IM_2007_30634	Terebra	succincta	SANTO 2006	Vanuatu	ED02	15°31.7'S, 167°09.7'E; 18-21	CONO429-08	EU685548	KJ710215	13	99/1	-/0.28	13a	-/-		13				13a	-/-
IM_2007_30386	Terebra	subulata	SANTO 2006	Vanuatu	DR13	15°36.6'S, 167°10.1'E; 8-20	CONO436-08	EU685551		14	100/1					14				14a	n/a
IM_2007_30444	Terebra	subulata	PANGLAO 2004	Philippines	R14	9°37.4'N, 123°54.5'E; 6-8	CONO209-08	EU685501	KJ710211	14	100/1	96/1				14				14b	97/0.98
IM_2007_30483	Terebra	subulata	PANGLAO 2004	Philippines	R76	9°33.5'N, 123°42.7'E; 1-5	CONO277-08	EU685524	JQ808994	14	100/1	96/1				14				14b	97/0.98
IM_2007_30388	Hastulopsis	pertusa	SANTO 2006	Vanuatu	FR10	n/a	CONO447-08	EU685562	JQ808967	15	98/1					15
IM_2007_30392	Hastulopsis	pertusa	SANTO 2006	Vanuatu	FR10	n/a	CONO448-08	EU685563	KJ710155	15	98/1					15
IM_2007_30390	Triplostephanus	fenestratus	PANGLAO 2005	Philippines	CP2340	9°29'N, 123°44'E; 271-318	CONO305-08	EU685531		16	90/1		16a	-/-		16ab	16a	98/0.95		16a	98/0.95
IM_2007_30406	Triplostephanus	fenestratus	PANGLAO 2005	Philippines	CP2232	9°39'N, 123°46'E; 396-418	CONO348-08	EU685533		16	90/1		16a	-/-		16ab	16a	98/0.95		16a	98/0.95
IM_2007_30410	Triplostephanus	fenestratus	PANGLAO 2005	Philippines	CP2331	9°39'N, 123°48'E; 255-268	CONO287-08	EU685529		16	90/1		16a	-/-		16ab	16a	98/0.95		16a	98/0.95
IM_2007_30418	Triplostephanus	fenestratus	PANGLAO 2005	Philippines	CP2331	9°39'N, 123°48'E; 255-268	CONO286-08	EU685528		16	90/1		16b	-/-		16ab	16a	98/0.95		16a	98/0.95
IM_2009_10073	Triplostephanus	fenestratus	MIRIKY	Madagascar	CP3241	14°30'S, 47°27'E; 274-325	CONO1313-12	JQ809206		16	90/1		16c	100/0.94		16c	16b	100/0.94		16b	100/0.94
IM_2009_10074	Triplostephanus	fenestratus	MIRIKY	Madagascar	CP3241	14°30'S, 47°27'E; 274-325	CONO1230-12	JQ809207		16	90/1		16c	100/0.94		16c	16b	100/0.94		16b	100/0.94
IM_2009_10075	Triplostephanus	fenestratus	MIRIKY	Madagascar	CP3241	14°30'S, 47°27'E; 274-325	CONO1193-12	JQ809208		16	90/1		16c	100/0.94		16c	16b	100/0.94		16b	100/0.94
IM_2009_10076	Triplostephanus	fenestratus	MIRIKY	Madagascar	CP3241	14°30'S, 47°27'E; 274-325	CONO1288-12	JQ809209	JQ809002	16	90/1	95/0.93	16c	100/0.94		16c	16b	100/0.94		16b	100/0.94
IM_2009_10077	Triplostephanus	fenestratus	MIRIKY	Madagascar	CP3241	14°30'S, 47°27'E; 274-325	CONO1164-12	JQ809210	KJ710229	16	90/1	95/0.93	16c	100/0.94		16c	16b	100/0.94		16b	100/0.94
IM_2009_10078	Triplostephanus	fenestratus	MIRIKY	Madagascar	CP3241	14°30'S, 47°27'E; 274-325	CONO1314-12	JQ809211		16	90/1		16c	100/0.94		16c	16b	100/0.94		16b	100/0.94
IM_2007_30391	Clathroterebra	fortunei	SALOMON 2	Solomon Islands	DW2221	7°59' S, 157°33' E; 260	CONO381-08	EU685535		17	69/1					17
IM_2007_30401	Clathroterebra	fortunei	PANGLAO 2005	Philippines	CP2331	9°39'N, 123°48'E; 255-268	CONO284-08	EU685526		17	69/1					17
IM_2007_30581	Clathroterebra	fortunei	PANGLAO 2005	Philippines	CP2331	9°39'N, 123°48'E; 255-268	CONO1130-12	JQ809005		17	69/1					17
IM_2009_29339	Clathroterebra	fortunei	BIOPAPUA	Papua-New-Guinea	CP3629	06°57'S, 147°08'E; 240-260	CONO1791-14	KJ672218		17	69/1					17
IM_2007_30394	Terebra	funiculata	SANTO 2006	Vanuatu	FR10		CONO450-08	EU685565	JQ808990	18	86/0.98					18	18a	n/a		18a	n/a		18a	n/a
IM_2009_7108	Terebra	funiculata	Hors campagne	Mozambique	Inhaca I	25°59.0'S, 32°54.5'E; 0	CONO1198-12	JQ809157		18	86/0.98					18	18b	98/1		18b	98/1		18b	98/1
IM_2009_7109	Terebra	funiculata	Hors campagne	Mozambique	Inhaca I	25°59.0'S, 32°54.5'E; 0	CONO1237-12	JQ809158	KJ710201	18	86/0.98					18	18b	98/1	79/0.95	18b	98/1		18b	98/1
IM_2009_7110	Terebra	funiculata	Hors campagne	Mozambique	Inhaca I	25°59.0'S, 32°54.5'E; 0	CONO1236-12	JQ809159	KJ710202	18	86/0.98					18	18b	98/1	79/0.95	18b	98/1		18b	98/1
IM_2007_30395	Pellifronia	jungi	PANGLAO 2005	Philippines	CP2334	9°38'N, 123°40'E; 606-631	CONO292-08	EU685530	JQ808984	19	99/1	100/1				19	19b	100/0.97		19b	100/0.97		19b	100/0.97
IM_2007_30539	Pellifronia	jungi	SANTO 2006	Vanuatu	AT72	15°44'S, 167°03'E; 618-722	CONO1261-12	JQ809129	KJ710195	19	99/1	100/1				19	19a	n/a		19a	n/a		19a	n/a
IM_2007_30584	Pellifronia	jungi	PANGLAO 2005	Philippines	CP2335	9°34'N, 123°38'E; 729-733	CONO347-08	EU685532		19	99/1					19	19b	100/0.97		19b	100/0.97		19b	100/0.97
IM_2007_30404	Triplostephanus	triseriatus	PANGLAO 2004	Philippines	T5	9°35.3'N, 123°52.2'E; 84-87	CONO205-08	EU685497	JQ809004	20	98/1	-/-				20				20b	-/-
IM_2009_10082	Triplostephanus	triseriatus	MIRIKY	Madagascar	CP3203	12°35,92' S, 48°35,22' E; 50-52	CONO1245-12	JQ809213		20	98/1					20				20b	-/-
IM_2009_10084	Triplostephanus	triseriatus	MIRIKY	Madagascar	CP3203	12°35,92' S, 48°35,22' E; 50-52	CONO1246-12	JQ809214	KJ710240	20	98/1	-/-				20				20a	-/-
IM_2009_10911	Triplostephanus	triseriatus	Hors campagne	Australia	Australia	27°02S, 153°19'E; 3-8	CONO1255-12	JQ809225	KJ710243	20	98/1	-/-				20				20b	-/-
IM_2009_9948	Triplostephanus	triseriatus	MIRIKY	Madagascar	CP3203	12°35,92' S, 48°35,22' E; 50-52	CONO1175-12	JQ809226	KJ710233	20	98/1	-/-				20				20b	-/-
IM_2009_9949	Triplostephanus	triseriatus	MIRIKY	Madagascar	CP3203	12°35,92' S, 48°35,22' E; 50-52	CONO1360-12	JQ809227	KJ710236	20	98/1	-/-				20				20b	-/-
IM_2009_9950	Triplostephanus	triseriatus	MIRIKY	Madagascar	CP3203	12°35,92' S, 48°35,22' E; 50-52	CONO1210012	JQ809228		20	98/1					20				20b	-/-
IM_2007_30407	Hastula	hectica	PANGLAO 2004	Philippines	M2	07°38,5'N, 008°25,1'W; 883	CONO260-08	EU685518	JQ808957	21	99/1	100/1				21				21b	-/-
IM_2007_30426	Hastula	hectica	SANTO 2006	Vanuatu	LD28	15°35.4'S, 166°58.7'E; 3-8	CONO498-08	EU685610		21	99/1					21				21b	-/-
IM_2009_10104	Hastula	hectica	ATIMO VATAE	Madagascar	TM21	25°08.9'S, 46°45.4'E; 0-1	CONO1252-12	JQ809055	KJ710147	21	99/1	100/1				21				21b	-/-
IM_2009_11872	Hastula	hectica	Hors campagne	Tahiti	Tahiti	17°30'28.28"S, 149°27'0.14"W; 0	CONO1222-12	JQ809056		21	99/1					21				21a	-/-
IM_2009_11873	Hastula	hectica	Hors campagne	Tahiti	Tahiti	17°30'28.28"S, 149°27'0.14"W; 0	CONO1223-12	JQ809057		21	99/1					21				21b	-/-
IM_2009_11874	Hastula	hectica	Hors campagne	Tahiti	Tahiti	17°30'28.28"S, 149°27'0.14"W; 0	CONO1367-12	JQ809058		21	99/1					21				21b	-/-
IM_2009_11875	Hastula	hectica	Hors campagne	Tahiti	Tahiti	17°30'28.28"S, 149°27'0.14"W; 0	CONO1368-12	JQ809059		21	99/1					21				21b	-/-
IM_2007_30408	Myurella	nebulosa	PANGLAO 2004	Philippines	S22	9°29.4'N, 123°56.0'E; 15-20	CONO248-08	EU685516		22	100/1					22				22a	76/0.92
IM_2007_30498	Myurella	nebulosa	SANTO 2006	Vanuatu	DR64	15°27.6'S, 167°14.3'E; 6-35	CONO479-08	EU685594	JQ808974	22	100/1	99/0.95				22				22a	76/0.92
IM_2007_30567	Myurella	nebulosa	SANTO 2006	Vanuatu	DR34	15°34.7'S, 167°13.8'E; 14-25	CONO459-08	EU685574		22	100/1					22				22a	76/0.92
IM_2009_10098	Myurella	nebulosa	MAINBAZA	Mozambique	DW3168	26°12'S, 35°03'E; 87-90	CONO1312-12	JQ809103		22	100/1					22				22a	76/0.92
IM_2009_10099	Myurella	nebulosa	MAINBAZA	Mozambique	DW3168	26°12'S, 35°03'E; 87-90	CONO1161-12	JQ809104		22	100/1					22				22b	n/a
IM_2009_7437	Myurella	nebulosa	MAINBAZA	Mozambique	DW3168	26°12'S, 35°03'E; 87-90	CONO1348-12	JQ809105	KJ710178	22	100/1	99/0.95				22				22a	76/0.92
IM_2009_7438	Myurella	nebulosa	MAINBAZA	Mozambique	DW3168	26°12'S, 35°03'E; 87-90	CONO1162-12	JQ809106		22	100/1					22				22a	76/0.92
IM_2009_7439	Myurella	nebulosa	MAINBAZA	Mozambique	DW3168	26°12'S, 35°03'E; 87-90	CONO1192-12	JQ809107		22	100/1					22				22a	76/0.92
IM_2007_30409	Terebra	tricolor	SANTO 2006	Vanuatu	DR02	15°33.1'S, 167°17.8'E; 15-25	CONO404-08	EU685540		23	91/1					23
IM_2007_30493	Terebra	tricolor	SANTO 2006	Vanuatu	DR87	15°38.5'S, 167°15.1'E; 13	CONO488-08	EU685602		23	91/1					23
IM_2007_30411	Triplostephanus	anilis	SANTO 2006	Vanuatu	LD28	15°35.4'S, 166°58.7'E; 3-8	CONO493-08	JQ809194		24	98/1		24a	-		24				24b	68/0.76
IM_2007_30552	Triplostephanus	anilis	SANTO 2006	Vanuatu	VM24	15°35.2'S, 167°59.4'E;	CONO473-08	EU685588	JQ809001	24	98/1	80/0.79	24b	-		24				24b	68/0.76
IM_2009_10068	Triplostephanus	anilis	Hors campagne	Mozambique	Inhaca I	25°59.0'S, 32°54.5'E; 0	CONO1354-12	JQ809195	KJ710225	24	98/1	80/0.79	24c	-		24				24a	67/0.49
IM_2009_10069	Triplostephanus	anilis	Hors campagne	Mozambique	Inhaca I	25°59.0'S, 32°54.5'E; 0	CONO1294-12	JQ809196		24	98/1		24c	-		24				24a	67/0.49
IM_2009_10070	Triplostephanus	anilis	Hors campagne	Mozambique	Inhaca I	25°59.0'S, 32°54.5'E; 0	CONO1295-12	JQ809197	KJ710224	24	98/1	80/0.79	24c	-		24				24a	67/0.49
IM_2009_10071	Triplostephanus	anilis	Hors campagne	Mozambique	Inhaca I	25°59.0'S, 32°54.5'E; 0	CONO1328-12	JQ809198		24	98/1		24c	-		24				24a	67/0.49
IM_2009_10072	Triplostephanus	anilis	Hors campagne	Mozambique	Inhaca I	25°59.0'S, 32°54.5'E; 0	CONO1355-12	JQ809199	KJ710228	24	98/1	80/0.79	24c	-		24				24a	67/0.49
IM_2009_7120	Triplostephanus	anilis	Hors campagne	Mozambique	Inhaca I	25°59.0'S, 32°54.5'E; 0	CONO1204-12	JQ809200		24	98/1		24c	-		24				24a	67/0.49
IM_2009_7121	Triplostephanus	anilis	Hors campagne	Mozambique	Inhaca I	25°59.0'S, 32°54.5'E; 0	CONO1203-12	JQ809201		24	98/1		24c	-		24				24a	67/0.49
IM_2009_7122	Triplostephanus	anilis	Hors campagne	Mozambique	Inhaca I	25°59.0'S, 32°54.5'E; 0	CONO1240-12	JQ809202	KJ710227	24	98/1	80/0.79	24d	-		24				24b	68/0.76
IM_2009_7123	Triplostephanus	anilis	Hors campagne	Mozambique	Inhaca I	25°59.0'S, 32°54.5'E; 0	CONO1356-12	JQ809203	KJ710226	24	98/1	80/0.79	24c	-		24				24a	67/0.49
IM_2007_30412	Myurella	affinis	SANTO 2006	Vanuatu	VM32	15°26.6'S, 167°15.2'E;	CONO468-08	EU685583		25	100/1					25				25c	6-/0.99
IM_2007_30414	Myurella	affinis	SANTO 2006	Vanuatu	VM32	15°26.6'S, 167°15.2'E;	CONO467-08	EU685582		25	100/1					25				25d	-/-
IM_2007_30415	Myurella	affinis	SANTO 2006	Vanuatu	VM73	15°35.8'S, 167°06.1'E;	CONO1285-12	JQ809082		25	100/1					25				25c	6-/0.99
IM_2007_30430	Myurella	affinis	PANGLAO 2004	Philippines	R14	9°37.4'N, 123°54.5'E; 6-8	CONO214-08	EU685506		25	100/1					25				25a	n/a
IM_2007_30439	Myurella	affinis	PANGLAO 2004	Philippines	D6	08°36.7'N, 079°00'W; 28	CONO218-08	EU685508	JQ808969	25	100/1	-/0.2				25				25b	-/-
IM_2007_30452	Myurella	affinis	PANGLAO 2004	Philippines	R14	9°37.4'N, 123°54.5'E; 6-8	CONO215-08	EU685507		25	100/1					25				25b	-/-
IM_2007_30460	Myurella	affinis	PANGLAO 2004	Philippines	S18	9°35.7'N, 123°44.4'E; 0-2	CONO239-08	EU685512		25	100/1					25				25d	-/-
IM_2007_30481	Myurella	affinis	PANGLAO 2004	Philippines	S18	9°35.7'N, 123°44.4'E; 0-2	CONO283-08	EU685525		25	100/1					25				25d	-/-
IM_2007_30529	Myurella	affinis	PANGLAO 2004	Philippines	D6	08°36.7'N, 079°00'W; 28	CONO1133-12	JQ809083		25	100/1					25				25b	-/-
IM_2007_30541	Myurella	affinis	SANTO 2006	Vanuatu	DR85	15°36.8'S, 167°08.5'E; 1-42	CONO485-08	EU685599	KJ710156	25	100/1	-/0.2				25				25b	-/-
IM_2007_30551	Myurella	affinis	SANTO 2006	Vanuatu	VM73	15°35.8'S, 167°06.1'E;	CONO1226-12	JQ809084	KJ710169	25	100/1	-/0.2				25				25d	-/-
IM_2007_30594	Myurella	affinis	SANTO 2006	Vanuatu	VM73	15°35.8'S, 167°06.1'E;	CONO475-08	EU685590	KJ710158	25	100/1	-/0.2				25				25d	-/-
IM_2009_10021	Myurella	affinis	Hors campagne	Mozambique	Inhaca I	25°59.0'S, 32°54.5'E; 0	CONO1202-12	JQ809085	KJ710171	25	100/1	-/0.2				25				25e	-/0.38
IM_2009_10022	Myurella	affinis	Hors campagne	Mozambique	Inhaca I	25°59.0'S, 32°54.5'E; 0	CONO1325-12	JQ809086	KJ710160	25	100/1	-/0.2				25				25e	-/0.38
IM_2009_10056	Myurella	affinis	Hors campagne	Mozambique	Inhaca I	25°59.0'S, 32°54.5'E; 0	CONO1292-12	JQ809087		25	100/1					25				25e	-/0.38
IM_2009_10058	Myurella	affinis	Hors campagne	Mozambique	Inhaca I	25°59.0'S, 32°54.5'E; 0	CONO1201-12	JQ809088		25	100/1					25				25e	-/0.38
IM_2009_10059	Myurella	affinis	Hors campagne	Mozambique	Inhaca I	25°59.0'S, 32°54.5'E; 0	CONO1239-12	JQ809089	KJ710164	25	100/1	-/0.2				25				25e	-/0.38
IM_2009_10060	Myurella	affinis	Hors campagne	Mozambique	Inhaca I	25°59.0'S, 32°54.5'E; 0	CONO1171-12	JQ809090	KJ710167	25	100/1	-/0.2				25				25e	-/0.38
IM_2009_10061	Myurella	affinis	Hors campagne	Mozambique	Inhaca I	25°59.0'S, 32°54.5'E; 0	CONO1170-12	JQ809091	KJ710161	25	100/1	-/0.2				25				25e	-/0.38
IM_2009_10062	Myurella	affinis	Hors campagne	Mozambique	Inhaca I	25°59.0'S, 32°54.5'E; 0	CONO1326-12	JQ809092	KJ710157	25	100/1	-/0.2				25				25e	-/0.38
IM_2009_10063	Myurella	affinis	Hors campagne	Mozambique	Inhaca I	25°59.0'S, 32°54.5'E; 0	CONO1272-12	JQ809093	KJ710166	25	100/1	-/0.2				25				25e	-/0.38
IM_2009_10064	Myurella	affinis	Hors campagne	Mozambique	Inhaca I	25°59.0'S, 32°54.5'E; 0	CONO1353-12	JQ809094	KJ710172	25	100/1	-/0.2				25				25e	-/0.38
IM_2009_10065	Myurella	affinis	Hors campagne	Mozambique	Inhaca I	25°59.0'S, 32°54.5'E; 0	CONO1116-10	JQ809081	KJ710159	25	100/1	-/0.2				25				25e	-/0.38
IM_2009_10066	Myurella	affinis	Hors campagne	Mozambique	Inhaca I	25°59.0'S, 32°54.5'E; 0	CONO1327-12	JQ809095	KJ710162	25	100/1	-/0.2				25				25e	-/0.38
IM_2009_10067	Myurella	affinis	Hors campagne	Mozambique	Inhaca I	25°59.0'S, 32°54.5'E; 0	CONO1293-12	JQ809096	KJ710163	25	100/1	-/0.2				25				25e	-/0.38
IM_2009_7092	Myurella	affinis	Hors campagne	Mozambique	Inhaca I	25°59.0'S, 32°54.5'E; 0	CONO1169-12	JQ809097	KJ710165	25	100/1	-/0.2				25				25e	-/0.38
IM_2009_7093	Myurella	affinis	Hors campagne	Mozambique	Inhaca I	25°59.0'S, 32°54.5'E; 0	CONO1200-12	JQ809098	KJ710170	25	100/1	-/0.2				25				25e	-/0.38
IM_2009_7094	Myurella	affinis	Hors campagne	Mozambique	Inhaca I	25°59.0'S, 32°54.5'E; 0	CONO1139-12	JQ809099		25	100/1					25				25e	-/0.38
IM_2009_7095	Myurella	affinis	Hors campagne	Mozambique	Inhaca I	25°59.0'S, 32°54.5'E; 0	CONO1324-12	JQ809100	KJ710168	25	100/1	-/0.2				25				25e	-/0.38
IM_2007_30416	Hastula	strigilata	SANTO 2006	Vanuatu	VM24	15°35.2'S, 167°59.4'E;	CONO1131-12	JQ809066		26	n/a					26				27b	97/0.84
IM_2007_30417	Hastula	solida	SANTO 2006	Vanuatu	VM32	15°26.6'S, 167°15.2'E;	CONO1189-12	JQ809063		27	100/1					27				27b	97/0.84
IM_2007_30550	Hastula	solida	SANTO 2006	Vanuatu	VM32	15°26.6'S, 167°15.2'E;	CONO476-08	EU685591		27	100/1					27				27b	97/0.84
IM_2009_7096	Hastula	solida	Hors campagne	Mozambique	Inhaca I	25°59.0'S, 32°54.5'E; 0	CONO1207-12	JQ809064	KJ710149	27	100/1	100/1				27				27a	n/a
IM_2009_7097	Hastula	solida	Hors campagne	Mozambique	Inhaca I	25°59.0'S, 32°54.5'E; 0	CONO1329-12	JQ809065	JQ808960	27	100/1	100/1				27				27b	97/0.84
IM_2007_30420	Hastula	strigilata	SANTO 2006	Vanuatu	VM24	15°35.2'S, 167°59.4'E;	CONO466-08	EU685581		28	100/1					28
IM_2007_30607	Hastula	strigilata	SANTO 2006	Vanuatu	VM24	15°35.2'S, 167°59.4'E;	CONO1132-12	JQ809068		28	100/1					28
IM_2007_30608	Hastula	strigilata	SANTO 2006	Vanuatu	VM24	15°35.2'S, 167°59.4'E;	CONO465-08	EU685580		28	100/1					28
IM_2007_30423	Terebra	fijiensis	SANTO 2006	Vanuatu	DS105	15°33'S, 167°16.7'E; 92	CONO520-08	EU685625		29	n/a					29
IM_2007_30425	Strioterebrum	nitidum	SANTO 2006	Vanuatu	LD28	15°35.4'S, 166°58.7'E; 3-8	CONO506-08	EU685616		30	100/1		30a	100/1		30a	30a	100/1		30a	100/1		30a	100/1
IM_2007_30473	Strioterebrum	nitidum	SANTO 2006	Vanuatu	LD28	15°35.4'S, 166°58.7'E; 3-8	CONO507-08	EU685617		30	100/1		30a	100/1		30a	30a	100/1		30a	100/1		30a	100/1
IM_2009_10157	Strioterebrum	nitidum	ATIMO VATAE	Madagascar	BP18	25°26.1'S, 44°55.2'E; 17-20	CONO1184-12	JQ809131	KJ710197	30	100/1	100/1	30b	99/0.98		30b	30b	100/0.98		30b	100/0.98		30b	100/0.98
IM_2009_10158	Strioterebrum	nitidum	ATIMO VATAE	Madagascar	BP20	25°24.1'S, 44°51.1'E; 24-26	CONO1277-12	JQ809132	JQ808985	30	100/1	100/1	30b	99/0.98		30b	30b	100/0.98		30b	100/0.98		30b	100/0.98
IM_2009_7114	Strioterebrum	nitidum	Hors campagne	Mozambique	Inhaca I	25°59.0'S, 32°54.5'E; 0	CONO1273-12	JQ809133	KJ710198	30	100/1	100/1	30b	99/0.98		30b	30b	100/0.98		30b	100/0.98		30b	100/0.98
IM_2007_30427	Triplostephanus	fenestratus	PANGLAO 2004	Philippines	T15	9°41'N, 123°49'E; 180	CONO235-08	KJ719559	KJ710109	31	100/1					31				31a	98/0.89
IM_2007_30538	Triplostephanus	fenestratus	PANGLAO 2005	Philippines	CP2331	9°39'N, 123°48'E; 255-268	CONO1284-12	JQ809204		31	100/1					31				31a	98/0.89
IM_2007_30553	Triplostephanus	fenestratus	BOA1	Vanuatu	CP2413	15°42'S, 167°02'E; 268-445	CONO1346-12	JQ809205		31	100/1					31				31b	n/a
IM_2007_30431	Terebra	laevigata	PANGLAO 2004	Philippines	M51	9°36.8'N, 123°52.2'E;	CONO262-08	EU685520		32	100/1					32
IM_2007_30573	Terebra	laevigata	SANTO 2006	Vanuatu	LD05	15°29.6'S, 167°14.9'E; 2-5	CONO1157-12	JQ809160	KJ710203	32	100/1					32
IM_2007_30597	Terebra	laevigata	SANTO 2006	Vanuatu	VM32	15°26.6'S, 167°15.2'E;	CONO471-08	EU685586		32	100/1					32
IM_2007_30603	Terebra	laevigata	SANTO 2006	Vanuatu	DR84	15°43.4'S, 167°15.0'E; 6	CONO484-08	EU685598		32	100/1					32
IM_2007_30613	Terebra	laevigata	SANTO 2006	Vanuatu	ED05	15°31.7'S, 167°09.4'E; 9-13	CONO458-08	EU685573		32	100/1					32
IM_2007_30632	Terebra	laevigata	SANTO 2006	Vanuatu	ED05	15°31.7'S, 167°09.4'E; 9-13	CONO457-08	EU685572		32	100/1					32
IM_2009_10017	Terebra	laevigata	Hors campagne	Mozambique	Inhaca I	25°59.0'S, 32°54.5'E; 0	CONO1142-12	JQ809161	KJ710205	32	100/1					32
IM_2009_10018	Terebra	laevigata	Hors campagne	Mozambique	Inhaca I	25°59.0'S, 32°54.5'E; 0	CONO1144-12	JQ809162	KJ710206	32	100/1					32
IM_2009_10019	Terebra	laevigata	Hors campagne	Mozambique	Inhaca I	25°59.0'S, 32°54.5'E; 0	CONO1173-12	JQ809163	KJ710204	32	100/1					32
IM_2009_7104	Terebra	laevigata	Hors campagne	Mozambique	Inhaca I	25°59.0'S, 32°54.5'E; 0	CONO1143-12	JQ809164		32	100/1					32
IM_2009_7105	Terebra	laevigata	Hors campagne	Mozambique	Inhaca I	25°59.0'S, 32°54.5'E; 0	CONO1330-12	JQ809165		32	100/1					32
IM_2009_7106	Terebra	laevigata	Hors campagne	Mozambique	Inhaca I	25°59.0'S, 32°54.5'E; 0	CONO1297-12	JQ809166	JQ808991	32	100/1					32
IM_2009_9947	Terebra	laevigata	Hors campagne	Mozambique	Inhaca I	25°59.0'S, 32°54.5'E; 0	CONO1276-12	JQ809167		32	100/1					32
IM_2007_30432	Duplicaria	sp.03	SANTO 2006	Vanuatu	LD28	15°35.4'S, 166°58.7'E; 3-8	CONO1256-12	JQ809018		33	99/1		33a	100/0.99		33a	33a	100/0.99		33a	100/0.99		33a	100/0.99
IM_2007_30466	Duplicaria	sp.03	SANTO 2006	Vanuatu	LD28	15°35.4'S, 166°58.7'E; 3-8	CONO1306-12	JQ809019		33	99/1		33a	100/0.99		33a	33a	100/0.99		33a	100/0.99		33a	100/0.99
IM_2009_10122	Duplicaria	sp.03	ATIMO VATAE	Madagascar	BP18	25°26.1'S, 44°55.2'E; 17-20	CONO1279-12	JQ809020	JQ808954	33	99/1	100/1	33b	-/-		33bj	33b	67/0.63		33b	67/0.63		33b	67/0.63
IM_2009_10123	Duplicaria	sp.03	ATIMO VATAE	Madagascar	BP33	25°25.80'S, 44°55.7'E; 11-13	CONO1214-12	JQ809021	KJ710128	33	99/1	100/1	33c	64/-		33bj	33b	67/0.63		33b	67/0.63		33b	67/0.63
IM_2009_10124	Duplicaria	sp.03	ATIMO VATAE	Madagascar	BP20	25°24.1'S, 44°51.1'E; 24-26	CONO1211-12	JQ809022	KJ710129	33	99/1	100/1	33c	64/-		33bj	33b	67/0.63		33b	67/0.63		33b	67/0.63
IM_2009_10125	Duplicaria	sp.03	ATIMO VATAE	Madagascar	BP18	25°26.1'S, 44°55.2'E; 17-20	CONO1342-12	JQ809023	KJ710130	33	99/1	100/1	33d	-/-		33bj	33b	67/0.63		33b	67/0.63		33b	67/0.63
IM_2009_10126	Duplicaria	sp.03	ATIMO VATAE	Madagascar	BP20	25°24.1'S, 44°51.1'E; 24-26	CONO1247-12	JQ809024	KJ710114	33	99/1	100/1	33b	-/-		33bj	33b	67/0.63		33b	67/0.63		33b	67/0.63
IM_2009_10134	Duplicaria	sp.03	ATIMO VATAE	Madagascar	BP17	25°25.9'S, 44°55.1'E; 18-20	CONO1341-12	JQ809025	KJ710132	33	99/1	100/1	33j	n/a		33bj	33b	67/0.63		33b	67/0.63		33b	67/0.63
IM_2009_10136	Duplicaria	sp.03	ATIMO VATAE	Madagascar	BP18	25°26.1'S, 44°55.2'E; 17-20	CONO1220-12	JQ809026	KJ710117	33	99/1	100/1	33b	-/-		33bj	33b	67/0.63		33b	67/0.63		33b	67/0.63
IM_2009_10137	Duplicaria	sp.03	ATIMO VATAE	Madagascar	BP33	25°25.80'S, 44°55.7'E; 11-13	CONO1215-12	JQ809027	KJ710118	33	99/1	100/1	33c	64/-		33bj	33b	67/0.63		33b	67/0.63		33b	67/0.63
IM_2009_10138	Duplicaria	sp.03	ATIMO VATAE	Madagascar	BP21	25°23.1'S, 44°51.4'E; 20-23	CONO1361-12	JQ809028	KJ710122	33	99/1	100/1	33e	n/a		33bj	33b	67/0.63		33b	67/0.63		33b	67/0.63
IM_2009_10139	Duplicaria	sp.03	ATIMO VATAE	Madagascar	BP20	25°24.1'S, 44°51.1'E; 24-26	CONO1147-12	JQ809029	KJ710126	33	99/1	100/1	33b	-/-		33bj	33b	67/0.63		33b	67/0.63		33b	67/0.63
IM_2009_10140	Duplicaria	sp.03	ATIMO VATAE	Madagascar	BP31	25°23.6'S, 44°53.3'E; 10012	CONO1176-12	JQ809030		33	99/1		33d	74/-		33bj	33b	67/0.63		33b	67/0.63		33b	67/0.63
IM_2009_10141	Duplicaria	sp.03	ATIMO VATAE	Madagascar	BP20	25°24.1'S, 44°51.1'E; 24-26	CONO1212-12	JQ809031	KJ710137	33	99/1	100/1	33f	-/-		33bj	33b	67/0.63		33b	67/0.63		33b	67/0.63
IM_2009_10142	Duplicaria	sp.03	ATIMO VATAE	Madagascar	BP20	25°24.1'S, 44°51.1'E; 24-26	CONO1248-12	JQ809032	KJ710121	33	99/1	100/1	33b	-/-		33bj	33b	67/0.63		33b	67/0.63		33b	67/0.63
IM_2009_10145	Duplicaria	sp.03	ATIMO VATAE	Madagascar	BP20	25°24.1'S, 44°51.1'E; 24-26	CONO1148-12	JQ809033	KJ710123	33	99/1	100/1	33g	n/a		33bj	33b	67/0.63		33b	67/0.63		33b	67/0.63
IM_2009_10146	Duplicaria	sp.03	ATIMO VATAE	Madagascar	BP18	25°26.1'S, 44°55.2'E; 17-20	CONO1343-12	JQ809034	KJ710131	33	99/1	100/1	33b	-/-		33bj	33b	67/0.63		33b	67/0.63		33b	67/0.63
IM_2009_10148	Duplicaria	sp.03	ATIMO VATAE	Madagascar	BP19	25°26.7'S, 44°55.8'E; 15	CONO1281-12	JQ809035	KJ710115	33	99/1	100/1	33b	-/-		33bj	33b	67/0.63		33b	67/0.63		33b	67/0.63
IM_2009_10149	Duplicaria	sp.03	ATIMO VATAE	Madagascar	BP19	25°26.7'S, 44°55.8'E; 15	CONO1282-12	JQ809036	KJ710135	33	99/1	100/1	33d	74/-		33bj	33b	67/0.63		33b	67/0.63		33b	67/0.63
IM_2009_10150	Duplicaria	sp.03	ATIMO VATAE	Madagascar	BP19	25°26.7'S, 44°55.8'E; 15	CONO1304-12	JQ809037	KJ710134	33	99/1	100/1	33c	64/-		33bj	33b	67/0.63		33b	67/0.63		33b	67/0.63
IM_2009_10151	Duplicaria	sp.03	ATIMO VATAE	Madagascar	BP20	25°24.1'S, 44°51.1'E; 24-26	CONO1149-12	JQ809038	KJ710136	33	99/1	100/1	33b	-/-		33bj	33b	67/0.63		33b	67/0.63		33b	67/0.63
IM_2009_10152	Duplicaria	sp.03	ATIMO VATAE	Madagascar	BP20	25°24.1'S, 44°51.1'E; 24-26	CONO1213-12	JQ809039	KJ710125	33	99/1	100/1	33h	n/a		33bj	33b	67/0.63		33b	67/0.63		33b	67/0.63
IM_2009_10153	Duplicaria	sp.03	ATIMO VATAE	Madagascar	BP20	25°24.1'S, 44°51.1'E; 24-26	CONO1150-12	JQ809040	KJ710127	33	99/1	100/1	33b	-/-		33bj	33b	67/0.63		33b	67/0.63		33b	67/0.63
IM_2009_10154	Duplicaria	sp.03	ATIMO VATAE	Madagascar	BP20	25°24.1'S, 44°51.1'E; 24-26	CONO1151-12	JQ809041	KJ710116	33	99/1	100/1	33i	74/-		33bj	33b	67/0.63		33b	67/0.63		33b	67/0.63
IM_2009_10155	Duplicaria	sp.03	ATIMO VATAE	Madagascar	BP33	25°25.80'S, 44°55.7'E; 11-13	CONO1299-12	JQ809042	KJ710120	33	99/1	100/1	33d	74/-		33bj	33b	67/0.63		33b	67/0.63		33b	67/0.63
IM_2009_10156	Duplicaria	sp.03	ATIMO VATAE	Madagascar	BP33	25°25.80'S, 44°55.7'E; 11-13	CONO1179-12	JQ809043	KJ710124	33	99/1	100/1	33b	-/-		33bj	33b	67/0.63		33b	67/0.63		33b	67/0.63
IM_2009_10159	Duplicaria	sp.03	ATIMO VATAE	Madagascar	BP33	25°25.80'S, 44°55.7'E; 11-13	CONO1178-12	JQ809044	KJ710119	33	99/1	100/1	33d	74/-		33bj	33b	67/0.63		33b	67/0.63		33b	67/0.63
IM_2009_10160	Duplicaria	sp.03	ATIMO VATAE	Madagascar	BP18	25°26.1'S, 44°55.2'E; 17-20	CONO1280-12	JQ809045	KJ710133	33	99/1	100/1	33d	74/-		33bj	33b	67/0.63		33b	67/0.63		33b	67/0.63
IM_2007_30435	Hastula	strigilata	SANTO 2006	Vanuatu	LD34	15°33.4'S, 167°12.4'E; 2-6	CONO1308-12	JQ809067	JQ808961	34	n/a					34
IM_2007_30437	Hastula	albula	SANTO 2006	Vanuatu	VM32	15°26.6'S, 167°15.2'E;	CONO477-08	EU685592	KJ710146	35	100/1	-/0.5				35
IM_2007_30438	Hastula	albula	SANTO 2006	Vanuatu	VM32	15°26.6'S, 167°15.2'E;	CONO478-08	EU685593	JQ808956	35	100/1	-/0.5				35
IM_2007_30457	Hastula	albula	SANTO 2006	Vanuatu	VM59	15°22.6'S, 167°11.6'E;	CONO501-08	EU685612		35	100/1					35
IM_2007_30630	Hastula	albula	SANTO 2006	Vanuatu	FS74	15°35.7'S, 166°59.3'E; 12	CONO511-08	EU685620	KJ710142	35	100/1	-/0.5				35
IM_2009_7100	Hastula	albula	Hors campagne	Mozambique	Inhaca I	25°59.0'S, 32°54.5'E; 0	CONO1358-12	JQ809051	KJ710144	35	100/1	-/0.5				35
IM_2009_7101	Hastula	albula	Hors campagne	Mozambique	Inhaca I	25°59.0'S, 32°54.5'E; 0	CONO1296-12	JQ809052	KJ710143	35	100/1	-/0.5				35
IM_2009_7102	Hastula	albula	Hors campagne	Mozambique	Inhaca I	25°59.0'S, 32°54.5'E; 0	CONO1275-12	JQ809053		35	100/1					35
IM_2009_7103	Hastula	albula	Hors campagne	Mozambique	Inhaca I	25°59.0'S, 32°54.5'E; 0	CONO1205-12	JQ809054	KJ710145	35	100/1	-/0.5				35
IM_2007_30442	Hastulopsis	mindanaoensis	PANGLAO 2004	Philippines	P4	9°31'N, 123°41'E; 100	CONO207-08	EU685499		36	n/a					36
IM_2007_30443	Oxymeris	felina	PANGLAO 2004	Philippines	R14	9°37.4'N, 123°54.5'E; 6-8	CONO208-08	EU685500		37	100/1					37
IM_2007_30445	Oxymeris	felina	PANGLAO 2004	Philippines	R14	9°37.4'N, 123°54.5'E; 6-8	CONO210008	EU685502	JQ808982	37	100/1					37
IM_2007_30446	Terenolla	pygmaea	PANGLAO 2004	Philippines	S2	9°37.4'N, 123°54.5'E; 4-5	CONO211-08	EU685503		38	99/1					38
IM_2007_30448	Terenolla	pygmaea	PANGLAO 2004	Philippines	S2	9°37.4'N, 123°54.5'E; 4-5	CONO212-08	EU685504		38	99/1					38
IM_2007_30449	Terenolla	pygmaea	PANGLAO 2004	Philippines	S2	9°37.4'N, 123°54.5'E; 4-5	CONO213-08	EU685505	KJ710223	38	99/1	90/0.43				38
IM_2007_30511	Terenolla	pygmaea	PANGLAO 2004	Philippines	S18	9°35.7'N, 123°44.4'E; 0-2	CONO236-08	EU685509		38	99/1					38
IM_2009_10121	Terenolla	pygmaea	ATIMO VATAE	Madagascar	BS19	n/a	CONO1231-12	JQ809193	JQ809000	38	99/1	90/0.43				38
IM_2007_30450	Strioterebrum	brunneobandatum	PANGLAO 2004	Philippines	T26	9°43'N, 123°49'E; 123-135	CONO256-08	EU685517		39	99/1					39				39a	n/a		39a	n/a
IM_2007_30522	Strioterebrum	brunneobandatum	SALOMON 2	Solomon Islands	CP2284	8°38' S, 157°22' E; 195-197	CONO1345-12	JQ809130	KJ710196	39	99/1					39				39b	n/a		39b	n/a
IM_2007_30453	Myurella	paucistriata	SANTO 2006	Vanuatu	LD05	15°29.6'S, 167°14.9'E; 2-5	CONO480-08	EU685595		40	n/a					40
IM_2007_30454	Strioterebrum	dedonderi	PANGLAO 2004	Philippines	T32	9°36.4'N, 123°53.8'E; 60-62	CONO263-08	EU685521		41	n/a					41
IM_2007_30455	Clathroterebra	poppei	PANGLAO 2004	Philippines	T32	9°36.4'N, 123°53.8'E; 60-62	CONO266-08	EU685523	JQ808947	42	100/1	100/1				42
IM_2007_30546	Clathroterebra	poppei	SANTO 2006	Vanuatu	AT44	15°36'S, 167°03'E; 86-118	CONO482-08	EU685596	KJ710110	42	100/1	100/1				42
IM_2007_30459	Myurella	kilburni	PANGLAO 2004	Philippines	S18	9°35.7'N, 123°44.4'E; 0-2	CONO238-08	EU685511	JQ808972	43	100/1	94/0.95				43
IM_2007_30461	Myurella	kilburni	SANTO 2006	Vanuatu	FS51	15°42.7'S, 167°15.1'E; 2-3	CONO491-08	EU685604	KJ710176	43	100/1	94/0.95				43
IM_2007_30463	Hastulopsis	conspersa	SANTO 2006	Vanuatu	FR10	n/a	CONO445-08	EU685560	JQ808965	44	80/1					44
IM_2007_30478	Hastulopsis	conspersa	SANTO 2006	Vanuatu	FR10	n/a	CONO446-08	EU685561		44	80/1					44
IM_2007_30619	Hastulopsis	conspersa	SANTO 2006	Vanuatu	FR08	15°33.1'S, 167°12.2'E; 3-40	CONO437-08	EU685552		44	80/1					44
IM_2007_30623	Hastulopsis	conspersa	SANTO 2006	Vanuatu	FR10	n/a	CONO443-08	EU685558	KJ710150	44	80/1					44
IM_2007_30624	Hastulopsis	conspersa	SANTO 2006	Vanuatu	LD34	15°33.4'S, 167°12.4'E; 2-6	CONO518-08	EU685623		44	80/1					44
IM_2007_30464	Terebra	sp.01	PANGLAO 2004	Philippines	T5	9°35.3'N, 123°52.2'E; 84-87	CONO206-08	EU685498		45	n/a					45
IM_2007_30465	Myurella	flavofasciata	PANGLAO 2004	Philippines	S22	9°29.4'N, 123°56.0'E; 15-20	CONO247-08	EU685515	JQ808971	46	100/1					46
IM_2009_7436	Myurella	flavofasciata	Hors campagne	Mozambique	Inhaca I	25°59.0'S, 32°54.5'E; 0	CONO1141-12	JQ809102	KJ710175	46	100/1					46
IM_2007_30469	Strioterebrum	plumbeum	SANTO 2006	Vanuatu	ED05	15°31.7'S, 167°09.4'E; 9-13	CONO456-08	EU685571		47	99/1					47
IM_2007_30558	Strioterebrum	plumbeum	SANTO 2006	Vanuatu	ED05	15°31.7'S, 167°09.4'E; 9-13	CONO455-08	EU685570		47	99/1					47
IM_2007_30471	Myurella	lineaperlata	SANTO 2006	Vanuatu	LD01	15°29'S, 167°14.9'E; 2-4	CONO461-08	EU685576		48	99/1					48
IM_2007_30612	Myurella	lineaperlata	SANTO 2006	Vanuatu	LD01	15°29'S, 167°14.9'E; 2-4	CONO460-08	EU685575	KJ710177	48	99/1	-/0.73				48
IM_2007_30635	Myurella	lineaperlata	SANTO 2006	Vanuatu	LD34	15°33.4'S, 167°12.4'E; 2-6	CONO519-08	EU685624	JQ808973	48	99/1	-/0.73				48
IM_2007_30480	Hastulopsis	pertusa	SANTO 2006	Vanuatu	FR10	n/a	CONO444-08	EU685559		49	n/a					49
IM_2007_30488	Hastulopsis	amoena	SANTO 2006	Vanuatu	ED05	15°31.7'S, 167°09.4'E; 9-13	CONO1259-12	JQ809070	JQ808964	50	100/1					50
IM_2009_10909	Hastulopsis	amoena	Hors campagne	Australia	Australia	26°56S, 153°23E; 40	CONO1221-12	JQ809071		50	100/1					50
IM_2009_10910	Hastulopsis	amoena	Hors campagne	Australia	Australia	26°56S, 153°23E; 40	CONO1305-12	JQ809072		50	100/1					50
IM_2007_30490	Oxymeris	chlorata	SANTO 2006	Vanuatu	VM59	15°22.6'S, 167°11.6'E;	CONO504-08	EU685615	JQ808979	51	n/a					51
IM_2007_30492	Terebra	trismacaria	SALOMON 2	Solomon Islands	CP2285	8°40' S, 157°23' E; 214-243	CONO384-08	EU685538		52	-/0.93					52				52a	57/0.9
IM_2007_30499	Terebra	trismacaria	SALOMON 2	Solomon Islands	CP2285	8°40' S, 157°23' E; 214-243	CONO385-08	EU685539		52	-/0.93					52				52b	n/a
IM_2007_30579	Terebra	trismacaria	SALOMON 2	Solomon Islands	CP2285	8°40' S, 157°23' E; 214-243	CONO383-08	EU685537		52	-/0.93					52				52a	57/0.9
IM_2007_30510	Myurella	columellaris	PANGLAO 2004	Philippines	S18	9°35.7'N, 123°44.4'E; 0-2	CONO237-08	EU685510	KJ710173	53	99/1	-/0.18				53
IM_2007_30598	Myurella	columellaris	SANTO 2006	Vanuatu	VM32	15°26.6'S, 167°15.2'E;	CONO469-08	EU685584	JQ808970	53	99/1	-/0.18				53
IM_2009_10020	Myurella	columellaris	Hors campagne	Mozambique	Inhaca I	25°59.0'S, 32°54.5'E; 0	CONO1357-12	JQ809101	KJ710174	53	99/1	-/0.18				53
IM_2007_30513	Myurella	sp.	PANGLAO 2004	Philippines	T32	9°36.4'N, 123°53.8'E; 60-62	CONO265-08	EU685522		54	97/1					54
IM_2009_10090	Myurella	sp.	MIRIKY	Madagascar	CP3203	12°35,92' S, 48°35,22' E; 50-52	CONO1174-12	JQ809110	JQ808975	54	98/1	-/0.76				54
IM_2009_10091	Myurella	sp.	MIRIKY	Madagascar	CP3203	12°35,92' S, 48°35,22' E; 50-52	CONO1332-12	JQ809111	KJ710184	54	98/1	-/0.76				54
IM_2009_10092	Myurella	sp.	MIRIKY	Madagascar	CP3203	12°35,92' S, 48°35,22' E; 50-52	CONO1244-12	JQ809112	KJ710180	54	98/1	-/0.76				54
IM_2009_10094	Myurella	sp.	MIRIKY	Madagascar	CP3274	15°30,15' S, 46°4,3' E; 29-36	CONO1264-12	JQ809113	KJ710182	54	98/1	-/0.76				54
IM_2009_10096	Myurella	sp.	MIRIKY	Madagascar	CP3203	12°35,92' S, 48°35,22' E; 50-52	CONO1298-12	JQ809114	KJ710183	54	98/1					54
IM_2009_10097	Myurella	sp.	MIRIKY	Madagascar	CP3203	12°35,92' S, 48°35,22' E; 50-52	CONO1333-12	JQ809115	KJ710179	54	98/1	-/0.76				54
IM_2009_7124	Myurella	sp.	Hors campagne	Mozambique	Inhaca I	25°59.0'S, 32°54.5'E; 0	CONO1323-12	JQ809116	KJ710181	54	98/1	-/0.76				54
IM_2009_7125	Myurella	sp.	Hors campagne	Mozambique	Inhaca I	25°59.0'S, 32°54.5'E; 0	CONO1322-12	JQ809117	KJ710185	54	98/1	-/0.76				54
IM_2007_30515	Myurella	orientalis	EBISCO	Chesterfield Islands	DW2618	20°06'S, 160°23'E; 280-304	CONO202-08	EU685494		55	100/1					55
IM_2007_30524	Myurella	orientalis	SALOMON 2	Solomon Islands	DW2301	9°07' S, 158°21' E; 267-329	CONO1250-12	JQ809108		55	100/1					55
IM_2007_30530	Myurella	orientalis	EBISCO	Chesterfield Islands	DW2561	20°29'S, 158°42'E; 197-230	CONO201-08	EU685493		55	100/1					55
IM_2009_29153	Myurella	orientalis	EXBODI	New-Caledonia	DW3930	18°37'S, 164°26'E, 448-464	CONO1756-14	KJ672179		55	100/1					55
IM_2009_29227	Myurella	orientalis	EXBODI	New-Caledonia	DW3872	22°54'S, 169°27'E; 159-756	CONO1757-14	KJ672193		55	100/1					55
IM_2009_9974	Myurella	orientalis	CONCALIS	New-Caledonia	DW2982	18°02'S, 163°04'E; 320-337	CONO1260-12	JQ809109		55	100/1					55
IM_2007_30516	Terebra	sp.02	EBISCO	Chesterfield Islands	DW2496	24°46'S, 159°43'E; 400-418	CONO1159-12	JQ809178		56	n/a					56
IM_2007_30533	Triplostephanus	sp.	PANGLAO 2004	Philippines	S19	9°42.1'N, 123°51.4'E; 3-4	CONO1310012	JQ809212		57	97/1					57
IM_2007_30534	Triplostephanus	sp.	PANGLAO 2004	Philippines	S19	9°42.1'N, 123°51.4'E; 3-4	CONO243-08	EU685514		57	97/1					57
IM_2007_30535	Hastula	lanceata	PANGLAO 2004	Philippines	B1	9°33.0'N, 123°46.5'E; 8-14	CONO203-08	EU685495	JQ808958	58	100/1					58
IM_2009_7089	Hastula	lanceata	Hors campagne	Mozambique	Inhaca I	25°59.0'S, 32°54.5'E; 0	CONO1274-12	JQ809060		58	100/1					58
IM_2009_7090	Hastula	lanceata	Hors campagne	Mozambique	Inhaca I	25°59.0'S, 32°54.5'E; 0	CONO1241-12	JQ809061		58	100/1					58
IM_2009_7091	Hastula	lanceata	Hors campagne	Mozambique	Inhaca I	25°59.0'S, 32°54.5'E; 0	CONO1140-12	JQ809062		58	100/1					58
IM_2007_30540	Hastula	penicillata	SANTO 2006	Vanuatu	VM59	15°22.6'S, 167°11.6'E;	CONO503-08	EU685614	KJ710148	59	100/1	98/0.99				59
IM_2007_30542	Hastula	penicillata	SANTO 2006	Vanuatu	VM59	15°22.6'S, 167°11.6'E;	CONO502-08	EU685613	JQ808959	59	100/1	98/0.99				59
IM_2007_30543	Strioterebrum	sp.03	SANTO 2006	Vanuatu	LD28	15°35.4'S, 166°58.7'E; 3-8	CONO499-08	EU685611		60	n/a					60
IM_2007_30544	Triplostephanus	jenningsi	SANTO 2006	Vanuatu	FR42	15°28.6'S, 167°15.1'E; 3-31	CONO483-08	EU685597	JQ809003	61	n/a					61
IM_2007_30609	Strioterebrum	sp.01	SANTO 2006	Vanuatu	VM24	15°35.2'S, 167°59.4'E;	CONO464-08	EU685579	JQ808986	62	n/a					62
IM_2007_30610	Strioterebrum	plumbeum	SANTO 2006	Vanuatu	VM24	15°35.2'S, 167°59.4'E;	CONO463-08	EU685578		63	n/a					63
IM_2007_30611	Strioterebrum	sp.02	SANTO 2006	Vanuatu	VM24	15°35.2'S, 167°59.4'E;	CONO462-08	EU685577		64	n/a					64
IM_2007_30617	Terebra	sp.03	SANTO 2006	Vanuatu	ED02	15°31.7'S, 167°09.7'E; 18-21	CONO430-08	EU685549	KJ710210	65	100/1	72/0.97				65
IM_2007_30618	Terebra	sp.03	SANTO 2006	Vanuatu	ED02	15°31.7'S, 167°09.7'E; 18-21	CONO431-08	EU685550	JQ808993	65	100/1	72/0.97				65
IM_2007_30633	Terebra	sp.04	SALOMON 2	Solomon Islands	DW2301	9°07' S, 158°21' E; 267-329	CONO1251-12	JQ809179		66	n/a					66
IM_2007_42068	Terebra	argosyia	PANAMA	Panama	D1	08°37.2'N, 079°01.1'W; 25	CONO962-09	FJ707443.1		67	95/1					67	67b	88/0.82		67c	-/0.99		67b	88/0.82
IM_2007_42069	Terebra	argosyia	PANAMA	Panama	D1	08°37.2'N, 079°01.1'W; 25	CONO963-09	FJ707444.1		67	95/1					67	67b	88/0.82		67b	-/-		67b	88/0.82
IM_2007_42072	Terebra	argosyia	PANAMA	Panama	D11	08°15.6'N, 078°51.6'W; 24	CONO964-09	FJ707445.1		67	95/1					67	67b	88/0.82		67c	-/0.99		67b	88/0.82
IM_2007_42073	Terebra	argosyia	PANAMA	Panama	D11	08°15.6'N, 078°51.6'W; 24	CONO965-09	FJ707446.1		67	95/1					67	67a	n/a		67a	n/a		67a	n/a
IM_2007_42084	Terebra	argosyia	PANAMA	Panama	D31	08°11.8'N, 078°57.1'W, 21	CONO966-09	FJ707447.1		67	95/1					67	67b	88/0.82		67c	-/0.99		67b	88/0.82
IM_2007_42085	Terebra	argosyia	PANAMA	Panama	D31	08°11.8'N, 078°57.1'W, 21	CONO967-09	FJ707448.1		67	95/1					67	67b	88/0.82		67c	-/0.99		67b	88/0.82
IM_2007_42086	Terebra	argosyia	PANAMA	Panama	D31	08°11.8'N, 078°57.1'W, 21	CONO968-09	FJ707449.1		67	95/1					67	67b	88/0.82		67c	-/0.99		67b	88/0.82
IM_2007_42087	Terebra	argosyia	PANAMA	Panama	D31	08°11.8'N, 078°57.1'W; 21	CONO969-09	FJ707450.1		67	95/1					67	67b	88/0.82		67d	41/0.82		67b	88/0.82
IM_2007_42089	Terebra	argosyia	PANAMA	Panama	D31	08°11.8'N, 078°57.1'W; 21	CONO970-09	FJ707451.1		67	95/1					67	67b	88/0.82		67d	41/0.82		67b	88/0.82
IM_2007_42090	Terebra	argosyia	PANAMA	Panama	D31	08°11.8'N, 078°57.1'W; 21	CONO971-09	FJ707452.1		67	95/1					67	67b	88/0.82		67d	41/0.82		67b	88/0.82
IM_2007_42091	Terebra	argosyia	PANAMA	Panama	D31	08°11.8'N, 078°57.1'W; 21	CONO972-09	FJ707453.1		67	95/1					67	67b	88/0.82		67d	41/0.82		67b	88/0.82
IM_2007_42092	Terebra	argosyia	PANAMA	Panama	D31	08°11.8'N, 078°57.1'W; 21	CONO973-09	FJ707454.1		67	95/1					67	67b	88/0.82		67d	41/0.82		67b	88/0.82
IM_2007_42099	Terebra	argosyia	PANAMA	Panama	D35	08°11.8'N, 078°57.5'W; 24	CONO975-09	FJ707456.1		67	95/1					67	67b	88/0.82		67d	41/0.82		67b	88/0.82
IM_2007_42100	Terebra	argosyia	PANAMA	Panama	D35	08°11.8'N, 078°57.5'W; 24	CONO976-09	FJ707457.1		67	95/1					67	67b	88/0.82		67b	-/-		67b	88/0.82
IM_2007_42103	Terebra	argosyia	PANAMA	Panama	D36	08°11.8'N, 078°57.5'W; 22	CONO977-09	FJ707458.1		67	95/1					67	67b	88/0.82		67d	41/0.82		67b	88/0.82
IM_2007_42104	Terebra	argosyia	PANAMA	Panama	D36	08°11.8'N, 078°57.5'W; 22	CONO978-09	FJ707459.1		67	95/1					67	67b	88/0.82		67d	41/0.82		67b	88/0.82
IM_2007_42118	Terebra	argosyia	PANAMA	Panama	D36	08°11.8'N, 078°57.5'W; 22	CONO980-09	FJ707461.1		67	95/1					67	67b	88/0.82		67d	41/0.82		67b	88/0.82
IM_2007_42119	Terebra	argosyia	PANAMA	Panama	D36	08°11.8'N, 078°57.5'W; 22	CONO981-09	FJ707462.1		67	95/1					67	67b	88/0.82		67d	41/0.82		67b	88/0.82
IM_2007_42120	Terebra	argosyia	PANAMA	Panama	D36	08°11.8'N, 078°57.5'W; 22	CONO982-09	FJ707463.1		67	95/1					67	67b	88/0.82		67d	41/0.82		67b	88/0.82
IM_2007_42121	Terebra	argosyia	PANAMA	Panama	D36	08°11.8'N, 078°57.5'W; 22	CONO983-09	FJ707464.1		67	95/1					67	67b	88/0.82		67d	41/0.82		67b	88/0.82
IM_2007_42122	Terebra	argosyia	PANAMA	Panama	D36	08°11.8'N, 078°57.5'W; 22	CONO984-09	FJ707465.1		67	95/1					67	67b	88/0.82		67d	41/0.82		67b	88/0.82
IM_2007_42123	Terebra	argosyia	PANAMA	Panama	D36	08°11.8'N, 078°57.5'W; 22	CONO985-09	FJ707466.1		67	95/1					67	67b	88/0.82		67d	41/0.82		67b	88/0.82
IM_2007_42124	Terebra	argosyia	PANAMA	Panama	D36	08°11.8'N, 078°57.5'W; 22	CONO986-09	FJ707467.1		67	95/1					67	67b	88/0.82		67d	41/0.82		67b	88/0.82
IM_2007_42125	Terebra	argosyia	PANAMA	Panama	D36	08°11.8'N, 078°57.5'W; 22	CONO987-09	FJ707468.1		67	95/1					67	67b	88/0.82		67d	41/0.82		67b	88/0.82
IM_2007_42070	Terebra	puncturosa	PANAMA	Panama	D11	08°15.6'N, 078°51.6'W; 24	CONO1229-12	JQ809172		68	100/1					68				68a	78/0.43
IM_2007_42081	Terebra	puncturosa	PANAMA	Panama	D31	08°11.8'N, 078°57.1'W; 21	CONO1315-12	JQ809173		68	100/1					68				68a	78/0.43
IM_2007_42116	Terebra	puncturosa	PANAMA	Panama	D36	08°11.8'N, 078°57.5'W; 22	CONO1266-12	JQ809174		68	100/1					68				68a	78/0.43
IM_2007_42171	Terebra	puncturosa	PANAMA	Panama	D70	08°33'N, 079°04'W; 19	CONO1167-12	JQ809175		68	100/1					68				68b	n/a
IM_2007_42083	Terebra	larvaeformis	PANAMA	Panama	D31	08°11.8'N, 078°57.1'W; 21	CONO1265-12	JQ809168		69	100/1					69
IM_2007_42106	Terebra	larvaeformis	PANAMA	Panama	D36	08°11.8'N, 078°57.5'W; 22	CONO1350-12	JQ809169		69	100/1					69
IM_2007_42113	Terebra	larvaeformis	PANAMA	Panama	D36	08°11.8'N, 078°57.5'W; 22	CONO1196-12	JQ809170		69	100/1					69
IM_2007_42149	Terebra	larvaeformis	PANAMA	Panama	D44	08°14.7'N, 079°05.4'W; 18	CONO1197-12	JQ809171		69	100/1					69
IM_2007_42093	Oxymeris	strigata	PANAMA	Panama	D32	08°11.8'N, 078°57.1'W; 24	CONO974-09	FJ707455.1		70	100/1					70				70a	100/0.93
IM_2007_42105	Oxymeris	strigata	PANAMA	Panama	D36	08°11.8'N, 078°57.5'W; 22	CONO979-09	FJ707460.1		70	100/1					70				70a	100/0.93
IM_2007_42136	Oxymeris	strigata	PANAMA	Panama	D43	08°14.7'N, 079°05.6'W, 18	CONO989-09	FJ707470.1		70	100/1					70				70b	100/0.74
IM_2007_42137	Oxymeris	strigata	PANAMA	Panama	D43	08°14.7'N, 079°05.6'W; 18	CONO990-09	FJ707471.1		70	100/1					70				70b	100/0.74
IM_2007_42095	Terebra	elata	PANAMA	Panama	D33	08°11.8'N, 078°57.1'W; 26	CONO1316-12	JQ809150		71	97/1		71a	n/a		71a	71a	n/a		71a	n/a		71a	n/a
IM_2007_42096	Terebra	elata	PANAMA	Panama	D33	08°11.8'N, 078°57.1'W; 26	CONO1317-12	JQ809151		71	97/1		71b	95/1		71b	71b	95/1		71b	95/1		71b	95/1
IM_2007_42111	Terebra	elata	PANAMA	Panama	D36	08°11.8'N, 078°57.5'W; 22	CONO1165-12	JQ809152		71	97/1		71b	95/1		71b	71b	95/1		71b	95/1		71b	95/1
IM_2007_42147	Terebra	elata	PANAMA	Panama	D44	08°14.7'N, 079°05.4'W; 18	CONO1320-12	JQ809153		71	97/1		71b	95/1		71b	71b	95/1		71b	95/1		71b	95/1
IM_2007_42155	Terebra	elata	PANAMA	Panama	D50	08°24.5'N, 079°04.7'W; 18	CONO1137-12	JQ809154		71	97/1		71b	95/1		71b	71b	95/1		71b	95/1		71b	95/1
IM_2007_42162	Terebra	elata	PANAMA	Panama	D66	08°31.2'N, 079°06.8'W; 32	CONO1352-12	JQ809155		71	97/1		71c	97/1		71c	71c	97/1		71c	97/1		71c	97/1
IM_2007_42163	Terebra	elata	PANAMA	Panama	D66	08°31.2'N, 079°06.8'W; 32	CONO1166-12	JQ809156		71	97/1		71c	97/1		71c	71c	97/1		71c	97/1		71c	97/1
IM_2007_42097	Terebra	cf.variegata	PANAMA	Panama	D33	08°11.8'N, 078°57.1'W; 26	CONO1195-12	JQ809138		72	97/1					72
IM_2007_42128	Terebra	cf.variegata	PANAMA	Panama	D39	08°14.9'N, 079°05.7'W; 14	CONO1366-12	JQ809139		72	97/1					72
IM_2007_42133	Terebra	cf.variegata	PANAMA	Panama	D42	08°14.8'N, 079°05.9'W; 13	CONO1318-12	JQ809140		72	97/1					72
IM_2007_42135	Terebra	cf.variegata	PANAMA	Panama	D42	08°14.8'N, 079°05.9'W; 13	CONO1319-12	JQ809141		72	97/1					72
IM_2007_42146	Terebra	cf.variegata	PANAMA	Panama	D43	08°14.7'N, 079°05.6'W; 18	CONO1135-12	JQ809142		72	97/1					72
IM_2007_42158	Terebra	cf.variegata	PANAMA	Panama	D50	08°24.5'N, 079°04.7'W; 18	CONO1136-12	JQ809143		72	97/1					72
IM_2007_42131	Terebra	ornata	PANAMA	Panama	D46	08°16.9'N, 079°02.7'W; 39	CONO988-09	FJ707469.1		73	n/a					73
IM_2007_42144	Terebra	berryi	PANAMA	Panama	D43	08°14.7'N, 079°05.6'W; 18	CONO1351-12	JQ809136		74	100/1					74
IM_2007_42167	Terebra	berryi	PANAMA	Panama	D70	08°33'N, 079°04'W; 19	CONO1290-12	JQ809137		74	100/1					74
IM_2007_42151	Terebra	specillata	PANAMA	Panama	D46	08°16.9'N, 079°02.7'W; 39	CONO1321-12	JQ809180		75	99/1					75
IM_2007_42154	Terebra	specillata	PANAMA	Panama	D50	08°24.5'N, 079°04.7'W; 18	CONO1232-12	JQ809181		75	99/1					75
IM_2007_42168	Terebra	specillata	PANAMA	Panama	D70	08°33'N, 079°04'W; 19	CONO1289-12	JQ809182		75	100/1					75
IM_2007_42152	Terebra	formosa	PANAMA	Panama	D46	08°16.9'N, 079°02.7'W; 39	CONO991-09	FJ707472.1		76	n/a					76
IM_2009_10013	Oxymeris	cerithina	Hors campagne	Mozambique	Inhaca I	25°59.0'S, 32°54.5'E; 0	CONO1138-12	JQ809119		77	100/1					77
IM_2009_10014	Oxymeris	cerithina	Hors campagne	Mozambique	Inhaca I	25°59.0'S, 32°54.5'E; 0	CONO1291-12	JQ809120		77	100/1					77
IM_2009_10015	Oxymeris	cerithina	Hors campagne	Mozambique	Inhaca I	25°59.0'S, 32°54.5'E; 0	CONO1199-12	JQ809121	KJ710191	77	100/1	100/1				77
IM_2009_7083	Oxymeris	cerithina	Hors campagne	Mozambique	Inhaca I	25°59.0'S, 32°54.5'E; 0	CONO1270-12	JQ809122	KJ710192	77	100/1	100/1				77
IM_2009_7084	Oxymeris	cerithina	Hors campagne	Mozambique	Inhaca I	25°59.0'S, 32°54.5'E; 0	CONO1268-12	JQ809123	KJ710190	77	100/1	100/1				77
IM_2009_7085	Oxymeris	cerithina	Hors campagne	Mozambique	Inhaca I	25°59.0'S, 32°54.5'E; 0	CONO1168-12	JQ809124		77	100/1					77
IM_2009_7086	Oxymeris	cerithina	Hors campagne	Mozambique	Inhaca I	25°59.0'S, 32°54.5'E; 0	CONO1269-12	JQ809125		77	100/1					77
IM_2009_9979	Oxymeris	cerithina	Hors campagne	Mozambique	Inhaca I	25°59.0'S, 32°54.5'E; 0	CONO1238-12	JQ809126	JQ808978	77	100/1	100/1				77
IM_2009_10080	Hastulopsis	pseudopertusa	MIRIKY	Madagascar	DW3230	13°25'S, 47°57'E; 71-158	CONO1145-12	JQ809079		78	100/1					78
IM_2009_9953	Hastulopsis	pseudopertusa	MIRIKY	Madagascar	CP3206	12°38,71' S, 48°21,52' E; 70-74	CONO1764-14	KJ672207		78	100/1					78
IM_2009_9954	Hastulopsis	pseudopertusa	MIRIKY	Madagascar	DW3230	13°25'S, 47°57'E; 71-158	CONO1146-12	JQ809080	JQ808968	78	100/1					78
IM_2009_10088	Terebra	textilis	MIRIKY	Madagascar	CP3288	14°31,9' S, 47°26,54' E; 46-54	CONO1311-12	JQ809189	JQ808997	79	n/a					79
IM_2009_10089	Terebra	textilis	MIRIKY	Madagascar	CP3274	15°30,15' S, 46°4,3' E; 29-36	CONO1763-14	KJ672215	KJ710208	80	100/1	-/0.15				80				80a	65/0.22
IM_2009_10093	Terebra	textilis	MIRIKY	Madagascar	CP3274	15°30,15' S, 46°4,3' E; 29-36	CONO1194-12	JQ809190	KJ710221	80	100/1	-/0.15				80				80b	-/-
IM_2009_10095	Terebra	textilis	MIRIKY	Madagascar	CP3274	15°30,15' S, 46°4,3' E; 29-36	CONO1349-12	JQ809191	JQ808998	80	100/1	-/0.15				80				80a	65/0.22
IM_2009_9957	Terebra	textilis	MIRIKY	Madagascar	CP3203	12°35,92' S, 48°35,22' E; 50-52	CONO1243-12	JQ809192		80	100/1	-/0.15				80				80b	-/-
IM_2009_10100	Triplostephanus	triseriatus	ATIMO VATAE	Madagascar	CP3538	25°22.4'S, 47°02.8'E; 89-95	CONO1181-12	JQ809215	KJ710235	81	100/1	68/0.98	81a	71/0.62		81				81a	-/-
IM_2009_10102	Triplostephanus	triseriatus	ATIMO VATAE	Madagascar	TP18	25°02.4'S, 47°03.2'E; 54-56	CONO1338-12	JQ809216	KJ710241	81	100/1	68/0.98	81a	71/0.62		81				81a	-/-
IM_2009_10108	Triplostephanus	triseriatus	ATIMO VATAE	Madagascar	CP3538	25°22.4'S, 47°02.8'E; 89-95	CONO1152-12	JQ809217	KJ710231	81	100/1	68/0.98	81b	92/0.98		81				81b	92/0.98
IM_2009_10166	Triplostephanus	triseriatus	ATIMO VATAE	Madagascar	CP3568	25°04.7'S, 47°03.4'E; 64-65	CONO1278-12	JQ809218	KJ710234	81	100/1	68/0.98	81b	92/0.98		81				81b	92/0.98
IM_2009_10167	Triplostephanus	triseriatus	ATIMO VATAE	Madagascar	CP3568	25°04.7'S, 47°03.4'E; 64-65	CONO1301-12	JQ809219	KJ710242	81	100/1	68/0.98	81a	71/0.62		81				81a	-/-
IM_2009_10168	Triplostephanus	triseriatus	ATIMO VATAE	Madagascar	CP3568	25°04.7'S, 47°03.4'E; 64-65	CONO1362-12	JQ809220	KJ710238	81	100/1	68/0.98	81c	98/0.86		81				81a	-/-
IM_2009_10169	Triplostephanus	triseriatus	ATIMO VATAE	Madagascar	CP3568	25°04.7'S, 47°03.4'E; 64-65	CONO1182-12	JQ809221	KJ710232	81	100/1	68/0.98	81b	92/0.98		81				81b	92/0.98
IM_2009_10170	Triplostephanus	triseriatus	ATIMO VATAE	Madagascar	CP3568	25°04.7'S, 47°03.4'E; 64-65	CONO1217-12	JQ809222	KJ710239	81	100/1	68/0.98	81a	71/0.62		81				81a	-/-
IM_2009_10172	Triplostephanus	triseriatus	ATIMO VATAE	Madagascar	CP3568	25°04.7'S, 47°03.4'E; 64-65	CONO1153-12	JQ809223	KJ710237	81	100/1	68/0.98	81b	92/0.98		81				81b	92/0.98
IM_2009_10173	Triplostephanus	triseriatus	ATIMO VATAE	Madagascar	CP3568	25°04.7'S, 47°03.4'E; 64-65	CONO1336-12	JQ809224		81	100/1		81c	98/0.86		81				81a	-/-
IM_2009_10106	Hastula	stylata	ATIMO VATAE	Madagascar	TM19	24°47.1'S, 47°11.9'E; 0-1	CONO1363-12	JQ809069	JQ808963	82	n/a					82
IM_2009_10111	Duplicaria	sp. 01	ATIMO VATAE	Madagascar	TP19	25°04.4'S, 46°55.3'E; 19-26	CONO1218-12	JQ809014	JQ808952	83	98/1	68/0.19				83
IM_2009_10115	Duplicaria	sp. 01	ATIMO VATAE	Madagascar	TP19	25°04.4'S, 46°55.3'E; 19-26	CONO1736-14	KJ672204	KJ710209	83	98/1	68/0.19				83
IM_2009_10117	Duplicaria	sp. 01	ATIMO VATAE	Madagascar	TP19	25°04.4'S, 46°55.3'E; 19-26	CONO1364-12	JQ809015	KJ710112	83	98/1	68/0.19				83
IM_2009_10112	Euterebra	fuscolutea	ATIMO VATAE	Madagascar	TP19	25°04.4'S, 46°55.3'E; 19-26	CONO1339-12	JQ809046	JQ808955	84	92/1	89/98				84							84a	44/0.74
IM_2009_10114	Euterebra	fuscolutea	ATIMO VATAE	Madagascar	TP28	25°03.7'S, 46°57.8'E; 7	CONO1365-12	JQ809047	KJ710140	84	92/1	89/98				84							84b	n/a
IM_2009_10127	Euterebra	fuscolutea	ATIMO VATAE	Madagascar	BP05	25°26.0'S, 44°54.2'E; 21-24	CONO1340-12	JQ809048	KJ710138	84	92/1	89/98				84							84a	44/0.74
IM_2009_10133	Euterebra	fuscolutea	ATIMO VATAE	Madagascar	BS06	25°26.8'S, 44°54.9'E; 27	CONO1334-12	JQ809049	KJ710139	84	92/1	89/98				84							84a	44/0.74
IM_2009_10147	Euterebra	fuscolutea	ATIMO VATAE	Madagascar	BP17	25°25.9'S, 44°55.1'E; 18-20	CONO1155-12	JQ809050	KJ710141	84	92/1	89/98				84							84c	n/a
IM_2009_10113	Duplicaria	sp. 02	ATIMO VATAE	Madagascar	TP24	25°03.7'S, 46°57.6'E; 2-7	CONO1253-12	JQ809016	KJ710113	85	100/0.98					85
IM_2009_10164	Duplicaria	sp. 02	ATIMO VATAE	Madagascar	TP24	25°03.7'S, 46°57.6'E; 2-7	CONO1219-12	JQ809017	JQ808953	85	100/0.98					85
IM_2009_10118	Hastulopsis	minipulchra	ATIMO VATAE	Madagascar	DW3626	25°30.2'S, 45°46.3'E; 41-42	CONO1183-12	JQ809073	JQ808966	86	94/0.99	79/0.76				86
IM_2009_10119	Hastulopsis	minipulchra	ATIMO VATAE	Madagascar	BS12	25°28.6'S, 44°56.8'E; 12	CONO1180-12	JQ809074		86	94/0.99					86
IM_2009_10120	Hastulopsis	minipulchra	ATIMO VATAE	Madagascar	BP42	25°22.8'S, 44°51.1'E; 18-21	CONO1216-12	JQ809075	KJ710153	86	94/0.99	79/0.76				86
IM_2009_10128	Hastulopsis	minipulchra	ATIMO VATAE	Madagascar	BP42	25°22.8'S, 44°51.1'E; 18-21	CONO1249-12	JQ809076	KJ710152	86	94/0.99	79/0.76				86
IM_2009_10129	Hastulopsis	minipulchra	ATIMO VATAE	Madagascar	BS12	25°28.6'S, 44°56.8'E; 12	CONO1335-12	JQ809077	KJ710151	86	94/0.99	79/0.76				86
IM_2009_10131	Hastulopsis	minipulchra	ATIMO VATAE	Madagascar	BP42	25°22.8'S, 44°51.1'E; 18-21	CONO1300-12	JQ809078	KJ710154	86	94/0.99	79/0.76				86
IM_2009_10162	Duplicaria	albofuscata	ATIMO VATAE	Madagascar	TP29	25°03.7'S, 46°57.7'E; 3-4	CONO1154-12	JQ809007	JQ808948	87	97/1	88/1				87
IM_2009_10163	Duplicaria	albofuscata	ATIMO VATAE	Madagascar	TP29	25°03.7'S, 46°57.7'E; 3-4	CONO1254-12	JQ809008	KJ710111	87	97/1	88/1				87
IM_2009_10908	Duplicaria	bernardi	Hors campagne	Australia	Australia	26°56S, 153°23E; 40	CONO1185-12	JQ809011	JQ808950	88	n/a					88
IM_2009_29454	Duplicaria	sp.04	WESTERN AUSTRALIA 2011	Australia	WB32	33°33'S, 115°04'E; 5-15	CONO1765-14	KJ672219		89	n/a					89
IM_2009_29801	Hastula	hastata	Hors Campagne	France (Guadeloupe)	Guadeloupe	n/a	CONO1737-14	KJ672165		90	n/a					90
IM_2009_7116	Terebra	quoygaimardi	Hors campagne	Mozambique	Inhaca I	25°59.0'S, 32°54.5'E; 0	CONO1233-12	JQ809176	JQ808992	91	100/1	85/0.93				91
IM_2009_9946	Terebra	quoygaimardi	Hors campagne	Mozambique	Inhaca I	25°59.0'S, 32°54.5'E; 0	CONO1235-12	JQ809177	KJ710207	91	100/1	85/0.93				91
IM_2009_9951	Duplicaria	raphanula	MIRIKY	Madagascar	DW3237	14°31'S, 47°25'E; 50-107	CONO1163-12	JQ809012		92	100/1					92
IM_2009_9952	Duplicaria	raphanula	MIRIKY	Madagascar	DW3237	14°31'S, 47°25'E; 50-107	CONO1287-12	JQ809013	JQ808951	92	100/1					92
IM_2009_9971	Clathroterebra	fortunei	MAINBAZA	Mozambique	CC3174	25°33'S, 33°13'E; 253-262	CONO1134-12	JQ809006		93	n/a					93
IM_2009_9973	Duplicaria	baileyi	TERRASSES	New-Caledonia	DW3093	22°06'S, 167°03'E; 190-200	CONO1263-12	JQ809009	JQ808949	94	93/1					94	94a	n/a		94a	n/a		94a	n/a
IM_2009_9977	Duplicaria	baileyi	TERRASSES	New-Caledonia	DW3093	22°06'S, 167°03'E; 190-200	CONO1262-12	JQ809010		94	93/1					94	94b	n/a		94b	n/a		94b	n/a
IM_2013_20351	Terebra	sp. 06	KARUBENTHOS	France (Guadeloupe)	GD02	16°22.57'N, 61°34.12'W; 80	CONO1740-14	KJ672197		95	100/1					95
IM_2013_20352	Terebra	sp. 06	KARUBENTHOS	France (Guadeloupe)	GD02	16°22.57'N, 61°34.12'W; 80	CONO1741-14	KJ672181		95	100/1					95
IM_2013_20529	Terebra	sp. 07	KARUBENTHOS	France (Guadeloupe)	GS32	16°21.35'N, 61°35.79'W; 2	CONO1775-14	KJ672191		96	100/1					96
IM_2013_9138	Terebra	sp. 07	KARUBENTHOS	France (Guadeloupe)	GD13	16°05.72'N, 61°46.26'W; 5	CONO1739-14	KJ672203		96	100/1					96
IM_2013_20530	Terebra	sp. 05	KARUBENTHOS	France (Guadeloupe)	GD31	16°24.97'N, 61°32.8'W; 85	CONO1776-14	KJ672190		97	100/1					97
IM_2013_20531	Terebra	sp. 05	KARUBENTHOS	France (Guadeloupe)	GD55	16°22.48'N, 61°35.46'W; 85	CONO1742-14	KJ672199		97	100/1					97
IM_2013_20532	Terebra	sp. 05	KARUBENTHOS	France (Guadeloupe)	GD23	16°24.97'N, 61°32.75'W; 80	CONO1743-14	KJ672183		97	100/1					97
IM_2013_20533	Terebra	sp. 05	KARUBENTHOS	France (Guadeloupe)	GD06	16°23'N, 61°33'W; 130	CONO1744-14	KJ672189		97	100/1					97
IM_2013_20534	Terebra	sp. 05	KARUBENTHOS	France (Guadeloupe)	GD06	16°23'N, 61°33'W; 130	CONO1745-14	KJ672210		97	100/1					97
IM_2013_20535	Terebra	sp. 05	KARUBENTHOS	France (Guadeloupe)	GD06	16°23'N, 61°33'W; 130	CONO1746-14	KJ672200		97	100/1					97
IM_2013_20536	Terebra	sp. 05	KARUBENTHOS	France (Guadeloupe)	GN25	16°24'N, 61°33'W; 135	CONO1747-14	KJ672187		97	100/1					97
IM_2013_20537	Terebra	sp. 05	KARUBENTHOS	France (Guadeloupe)	GN25	16°24'N, 61°33'W; 135	CONO1748-14	KJ672180		97	100/1					97
IM_2013_20538	Terebra	sp. 05	KARUBENTHOS	France (Guadeloupe)	GD02	16°22.57'N, 61°34.12'W; 80	CONO1749-14	KJ672217		97	100/1					97
IM_2013_20539	Terebra	sp. 05	KARUBENTHOS	France (Guadeloupe)	GD02	16°22.57'N, 61°34.12'W; 80	CONO1750-14	KJ672205		97	100/1					97
IM_2013_20540	Terebra	sp. 05	KARUBENTHOS	France (Guadeloupe)	GD02	16°22.57'N, 61°34.12'W; 80	CONO1751-14	KJ672195		97	100/1					97
IM_2013_20541	Terebra	sp. 05	KARUBENTHOS	France (Guadeloupe)	GD02	16°22.57'N, 61°34.12'W; 80	CONO1752-14	KJ672182		97	100/1					97
IM_2013_20542	Terebra	sp. 05	KARUBENTHOS	France (Guadeloupe)	GD02	16°22.57'N, 61°34.12'W; 80	CONO1753-14	KJ672202		97	100/1					97
IM_2013_9035	Terebra	sp. 05	KARUBENTHOS	France (Guadeloupe)	GN27	16°23'N, 61°33'W; 120	CONO1774-14	KJ672196		97	100/1					97
IM_2013_9110	Terebra	sp. 05	KARUBENTHOS	France (Guadeloupe)	GD35	16°22.77'N, 61°34.19'W; 66	CONO1738-14	KJ672216		97	100/1					97
IM_2013_20543	Hastula	sp.	KARUBENTHOS	France (Guadeloupe)	GM13	16°10.29'N, 61°46.58'W; 1	CONO1777-14	KJ672214		98	99/1		98a	-/0.17		98
IM_2013_8747	Hastula	sp.	KARUBENTHOS	France (Guadeloupe)	GM35	15°51.55'N, 61°37.47'W; 0	CONO1778-14	KJ672170		98	99/1		98a	-/0.17		98
IM_2013_8748	Hastula	sp.	KARUBENTHOS	France (Guadeloupe)	GM35	15°51.55'N, 61°37.47'W; 0	CONO1779-14	KJ672167		98	99/1		98a	-/0.17		98
IM_2013_8749	Hastula	sp.	KARUBENTHOS	France (Guadeloupe)	GM35	15°51.55'N, 61°37.47'W; 0	CONO1780-14	KJ672178		98	99/1		98a	-/0.17		98
IM_2013_8751	Hastula	sp.	KARUBENTHOS	France (Guadeloupe)	GM35	15°51.55'N, 61°37.47'W; 0	CONO1781-14	KJ672172		98	99/1		98a	-/0.17		98
IM_2013_8752	Hastula	sp.	KARUBENTHOS	France (Guadeloupe)	GM35	15°51.55'N, 61°37.47'W; 0	CONO1782-14	KJ672176		98	99/1		98a	-/0.17		98
IM_2013_8754	Hastula	sp.	KARUBENTHOS	France (Guadeloupe)	GM35	15°51.55'N, 61°37.47'W; 0	CONO1783-14	KJ672174		98	99/1		98a	-/0.17		98
IM_2013_8755	Hastula	sp.	KARUBENTHOS	France (Guadeloupe)	GM35	15°51.55'N, 61°37.47'W; 0	CONO1784-14	KJ672173		98	99/1		98a	-/0.17		98
IM_2013_8756	Hastula	sp.	KARUBENTHOS	France (Guadeloupe)	GM35	15°51.55'N, 61°37.47'W; 0	CONO1785-14	KJ672168		98	99/1		98a	-/0.17		98
IM_2013_8757	Hastula	sp.	KARUBENTHOS	France (Guadeloupe)	GM35	15°51.55'N, 61°37.47'W; 0	CONO1786-14	KJ672169		98	99/1		98a	-/0.17		98
IM_2013_8758	Hastula	sp.	KARUBENTHOS	France (Guadeloupe)	GM35	15°51.55'N, 61°37.47'W; 0	CONO1787-14	KJ672177		98	99/1		98a	-/0.17		98
IM_2013_8759	Hastula	sp.	KARUBENTHOS	France (Guadeloupe)	GM35	15°51.55'N, 61°37.47'W; 0	CONO1788-14	KJ672166		98	99/1		98a	-/0.17		98
IM_2013_8760	Hastula	sp.	KARUBENTHOS	France (Guadeloupe)	GM35	15°51.55'N, 61°37.47'W; 0	CONO1789-14	KJ672175		98	99/1		98b	n/a		98
IM_2013_8761	Hastula	sp.	KARUBENTHOS	France (Guadeloupe)	GM35	15°51.55'N, 61°37.47'W; 0	CONO1790-14	KJ672171		98	99/1		98a	-/0.17		98
IM_2013_8765	Hastula	sp.	KARUBENTHOS	France (Guadeloupe)	GM13	16°10.29'N, 61°46.58'W; 1	CONO1766-14	KJ672213		98	99/1		98a	-/0.17		98
IM_2013_8766	Hastula	sp.	KARUBENTHOS	France (Guadeloupe)	GM13	16°10.29'N, 61°46.58'W; 1	CONO1767-14	KJ672198		98	99/1		98a	-/0.17		98
IM_2013_8767	Hastula	sp.	KARUBENTHOS	France (Guadeloupe)	GM13	16°10.29'N, 61°46.58'W; 1	CONO1768-14	KJ672220		98	99/1		98a	-/0.17		98
IM_2013_8768	Hastula	sp.	KARUBENTHOS	France (Guadeloupe)	GM13	16°10.29'N, 61°46.58'W; 1	CONO1769-14	KJ672201		98	99/1		98a	-/0.17		98
IM_2013_8769	Hastula	sp.	KARUBENTHOS	France (Guadeloupe)	GM13	16°10.29'N, 61°46.58'W; 1	CONO1770-14	KJ672185		98	99/1		98c	n/a		98
IM_2013_8770	Hastula	sp.	KARUBENTHOS	France (Guadeloupe)	GM13	16°10.29'N, 61°46.58'W; 1	CONO1771-14	KJ672206		98	99/1		98a	-/0.17		98
IM_2013_8771	Hastula	sp.	KARUBENTHOS	France (Guadeloupe)	GM13	16°10.29'N, 61°46.58'W; 1	CONO1772-14	KJ672184		98	99/1		98a	-/0.17		98
IM_2013_8772	Hastula	sp.	KARUBENTHOS	France (Guadeloupe)	GM13	16°10.29'N, 61°46.58'W; 1	CONO1773-14	KJ672211		98	99/1		98a	-/0.17		98
TOT PSHs										98			125				110			130			112
